# Supplementary material
Source: PubMed Central journal article supplement (PMC9357171)
Supplement: NIHMS1822295-supplement-320952_Data_Supplement.pdf [file NIHMS1822295-supplement-320952_Data_Supplement.pdf]

**Association of Physical Activity with the Bioactive Lipidome and Incident Cardiovascular Events – Results from the VITamin D and Omega-3 Trial (VITAL) and JUPITER studies**

Rosangela A. Hoshi, Yanyan Liu, Heike Luttmann-Gibson, Saumya Tiwari, Franco Giulianini, Allen M. Andres, Jeramie D. Watrous, Nancy R. Cook, Trisha Copeland, Karen H. Costenbader, Olivia I. Okereke, Paul M. Ridker, JoAnn E. Manson, I-Min Lee, Vinayagamorthy, Manickavasagar, Susan Cheng, Mohit Jain, Daniel I. Chasman, Olga V. Demler, Samia Mora

**SUPPLEMENTAL MATERIAL**

**Table of contents**

**Supplemental Methods**

|                                                             |        |
|-------------------------------------------------------------|--------|
| Blood Sample Collection .....                               | page 3 |
| Non-targeted Metabolomic Measurements with LC-MS Assay..... | page 3 |
| PA assessment.....                                          | page 5 |

**Supplemental tables**

|                |         |
|----------------|---------|
| Table S1 ..... | page 6  |
| Table S2 ..... | page 28 |
| Table S3 ..... | page 12 |
| Table S4 ..... | page 14 |
| Table S5 ..... | page 16 |
| Table S6 ..... | page 24 |
| Table S7 ..... | page 28 |

**Supplemental Figures**

|               |         |
|---------------|---------|
| Fig. S1 ..... | page 30 |
| Fig. S2 ..... | page 31 |
| Fig. S3 ..... | page 32 |
| Fig. S4 ..... | page 36 |
| Fig. S5 ..... | page 37 |
| Fig. S6 ..... | page 38 |
| Fig. S7 ..... | page 39 |

## **Supplemental Methods**

### **Blood Sample Collection**

VITAL-CTSC participants baseline visits took place between January 2012 and March 2014 in which they provided fasting blood samples. Visits to the CTSC provided the opportunity for face-to-face contact, allowing for detailed phenotyping and in-person validation of the remote assessment methods used in the main trial and ancillary studies. Both VITAL-CTSC and VITAL-CVD subsets, a baseline blood sample was provided voluntarily pre-main trial randomization. Participants were mailed a blood collection kit that contained a consent form, supplies and instructions for blood draw, and a cold pack and were returned via prepaid overnight courier. Upon arrival, samples were centrifuged and aliquoted into cryotubes as plasma, buffy coat, and red blood cells, and stored in liquid nitrogen freezers at a temperature of  $\leq -130$  °C. The process was completed within several hours of specimen receipt and the vast majority of samples were frozen within 30–36 h after venipuncture.

As part of the JUPITER protocol, all study participants provided a blood sample before randomization. Part of these blood samples were assayed in a core laboratory for LDL-C, HDL-C, apo B, and hsCRP as previously described<sup>15,21</sup>, and other part were frozen and stored for future analyses.

### **Non-targeted Metabolomic Measurements with LC-MS Assay**

Blood samples from both main studies were stored in vapor-phase liquid nitrogen (-170°C), thawed, separated into aliquots, refrozen, and shipped on dry ice to the University of California, San Diego. Approximately 11,000 features were extracted by using the method described in

Watrous et al. (2019). In addition to experimental and pooled plasma samples, a library of chemical standards (mostly from Cayman Chemicals) was run. Features from the experimental samples were then matched to those of the chemical standards library based on their  $m/z$ , retention times and fragmentation mass spectrum. Tandem plasma samples from respective case and control participants were randomly placed in neighboring wells on a plate to minimize effects of instrument drifts and were blindly assayed. Internal standards were inserted in each well and three pooled plasma samples were placed at the beginning in the middle and at the end of each plate to monitor for any drift in data quality. Annotations of BAL in datasets were verified further by examining the raw spectral data. Additionally, as BAL with high correlations can be features of the same compound, raw spectral data were used to resolve these instances to avoid the same compound appearing more than once in the dataset.

Eicosanoids and related oxylipins were measured through a directed non-targeted mass spectrometry approach, developed by Watrous et al. <sup>17</sup>, that expanded the repertoire of oxylipins assayed in humans is and fully described elsewhere, using high mass accuracy LC-MS for measurement of bioactive lipid species. Briefly, using chemical networking of MS/MS spectral fragments and system analysis of chemical patterning, they found distinct oxylipin entities in human plasma, including compounds not previously documented in humans, and unknown compounds. Then, three databases, including an in-house database from oxylipin commercial standards were used for identification. Only the top scoring hit was considered for all matches to library reference spectra. All resulting matches were manually checked for consistency in fragmentation patterns between the library reference and experimental spectra. Finally, Custom Library Search for all known, putative known and putative novel oxylipins was performed using an RT tolerance of 0.1 minutes and a mass tolerance of  $\pm 5$  ppm. Resulting features were manually

denoised by visual inspection using the Mzmine peak list viewer where features exhibiting abnormal/poor peak shapes, inconsistent peak shapes and/or drastic shifts in retention time were deleted.

### **PA assessment**

In VITAL, PA was assessed through a self-administrated questionnaire with questions regarding the average amount of time during the last 12 months spent in each of the following activities per week: jogging (i.e., > 10-minute miles), running (i.e., < 10-minute miles), aerobic exercise, aerobic dance, exercise machines, tennis, squash, racquetball, or lap swimming – defined as vigorous activities that require  $\geq 6$  metabolic equivalent of task (METs); walking or hiking (normal, brisk or very brisk pace, including walking to work), bicycling (including stationary bike), lower intensity exercise, yoga, stretching, toning, weight lifting, strength training, or other exercises (not considering stairs climbing) – defined as moderate activities that require 3 to 5.9 METs; and slow walking - defined as light activity that requires < 3METs; The total reported PA was calculated as weekly energy expenditure in METs by multiplying the intensity of each type of PA (MET) and time spent in the activity according to the questionnaire. Participants from VITAL with self-reported MET-hrs/wk  $\geq 3$ SD from the mean were considered outliers and excluded from the analysis. PA continuous values were shifted and rescaled to mean 0 and SD = 1 for better comparison across studies and more interpretable results.

In JUPITER, PA was treated as an ordinal variable ranging from 1 to 6, according to the category of self-reported frequency per week: 1) Rarely/Never, 2) less than once a week, 3) once a week, 4) 2-3 times a week, 5) 4-6 times a week, or 6) daily.

## Supplemental tables

**Table S1.**  $\beta$  coefficients and 95% confidence interval from model 2 (adjusted for age, sex, race/ethnicity, LDL-C, total-C, and smoking) of 145 BAL significantly associated with PA in VITAL-CTSC (FDR <.1) and validated in JUPITER-NC (FDR <.1)

| BAL <i>m/z</i> | rt   | VITAL-CTSC          |              |                       | JUPITER-NC          |              |                       | Annotation |
|----------------|------|---------------------|--------------|-----------------------|---------------------|--------------|-----------------------|------------|
|                |      | $\beta$ coefficient | 95% CI       | P-value*              | $\beta$ coefficient | 95% CI       | P-value*              |            |
| 225.113        | 1.87 | 0.09                | 0.03; 0.15   | 4.0x10 <sup>-03</sup> | 0.06                | 0.01; 0.10   | 1.5x10 <sup>-02</sup> | --         |
| 228.16         | 2.53 | 0.16                | 0.10; 0.22   | 3.9x10 <sup>-07</sup> | 0.08                | 0.04; 0.13   | 1.6x10 <sup>-04</sup> | --         |
| 236.6398       | 2.65 | -0.08               | -0.14; -0.02 | 1.1x10 <sup>-02</sup> | -0.08               | -0.12; -0.04 | 2.4x10 <sup>-04</sup> | --         |
| 237.1493       | 3.96 | 0.09                | 0.02; 0.15   | 7.2x10 <sup>-03</sup> | 0.07                | 0.03; 0.12   | 1.6x10 <sup>-03</sup> | --         |
| 237.1494       | 4.48 | 0.12                | 0.06; 0.18   | 1.9x10 <sup>-04</sup> | 0.06                | 0.02; 0.11   | 7.6x10 <sup>-03</sup> | --         |
| 237.1495       | 3.23 | 0.13                | 0.07; 0.20   | 2.6x10 <sup>-05</sup> | 0.09                | 0.05; 0.13   | 6.2x10 <sup>-05</sup> | --         |
| 237.1495       | 4.42 | 0.12                | 0.06; 0.18   | 1.9x10 <sup>-04</sup> | 0.08                | 0.03; 0.12   | 9.3x10 <sup>-04</sup> | --         |
| 237.1859       | 5.46 | 0.13                | 0.07; 0.19   | 2.6x10 <sup>-05</sup> | 0.07                | 0.02; 0.11   | 2.4x10 <sup>-03</sup> | --         |
| 239.1287       | 1.84 | 0.11                | 0.05; 0.17   | 6.6x10 <sup>-04</sup> | 0.06                | 0.02; 0.11   | 5.4x10 <sup>-03</sup> | --         |
| 241.1808       | 3.27 | -0.1                | -0.15; -0.04 | 8.0x10 <sup>-04</sup> | -0.07               | -0.11; -0.02 | 1.8x10 <sup>-03</sup> | --         |
| 243.1965       | 5.99 | 0.1                 | 0.04; 0.16   | 1.2x10 <sup>-03</sup> | 0.07                | 0.03; 0.12   | 8.9x10 <sup>-04</sup> | --         |
| 245.0863       | 2.79 | 0.09                | 0.03; 0.15   | 5.4x10 <sup>-03</sup> | 0.09                | 0.04; 0.13   | 1.4x10 <sup>-04</sup> | --         |
| 251.1289       | 2.63 | 0.1                 | 0.03; 0.16   | 2.9x10 <sup>-03</sup> | 0.06                | 0.02; 0.11   | 8.1x10 <sup>-03</sup> | --         |
| 251.166        | 4.83 | 0.15                | 0.09; 0.21   | 2.6x10 <sup>-06</sup> | 0.08                | 0.03; 0.12   | 8.4x10 <sup>-04</sup> | --         |
| 251.2015       | 6.38 | -0.12               | -0.18; -0.06 | 4.9x10 <sup>-05</sup> | -0.05               | -0.09; -0.01 | 1.8x10 <sup>-02</sup> | --         |
| 251.2017       | 6.31 | -0.14               | -0.20; -0.09 | 4.3x10 <sup>-07</sup> | -0.05               | -0.09; -0.01 | 1.2x10 <sup>-02</sup> | --         |
| 253.1445       | 2.71 | 0.09                | 0.03; 0.15   | 4.9x10 <sup>-03</sup> | 0.07                | 0.02; 0.11   | 4.4x10 <sup>-03</sup> | --         |
| 253.1446       | 2.34 | 0.09                | 0.03; 0.15   | 5.6x10 <sup>-03</sup> | 0.07                | 0.02; 0.11   | 4.5x10 <sup>-03</sup> | --         |
| 253.1447       | 1.95 | 0.13                | 0.07; 0.19   | 4.6x10 <sup>-05</sup> | 0.06                | 0.01; 0.11   | 9.5x10 <sup>-03</sup> | --         |
| 253.1448       | 2.65 | 0.12                | 0.06; 0.18   | 1.7x10 <sup>-04</sup> | 0.07                | 0.03; 0.12   | 1.4x10 <sup>-03</sup> | --         |
| 254.2226       | 6.51 | -0.08               | -0.14; -0.03 | 4.4x10 <sup>-03</sup> | -0.05               | -0.10; -0.01 | 1.3x10 <sup>-02</sup> | --         |
| 257.1759       | 2.86 | 0.17                | 0.11; 0.23   | 7.3x10 <sup>-08</sup> | 0.07                | 0.03; 0.12   | 1.4x10 <sup>-03</sup> | --         |

|                 |      |       |              |                       |       |              |                       |              |
|-----------------|------|-------|--------------|-----------------------|-------|--------------|-----------------------|--------------|
| <b>257.1761</b> | 2.81 | 0.17  | 0.11; 0.23   | $7.3 \times 10^{-08}$ | 0.07  | 0.03; 0.12   | $2.1 \times 10^{-03}$ | --           |
| <b>257.1762</b> | 2.89 | 0.17  | 0.11; 0.23   | $7.3 \times 10^{-08}$ | 0.1   | 0.06; 0.15   | $5.2 \times 10^{-06}$ | --           |
| <b>265.1813</b> | 5.28 | 0.16  | 0.10; 0.22   | $4.3 \times 10^{-07}$ | 0.09  | 0.05; 0.14   | $8.5 \times 10^{-05}$ | --           |
| <b>267.1597</b> | 2.3  | 0.1   | 0.03; 0.16   | $2.4 \times 10^{-03}$ | 0.07  | 0.02; 0.11   | $4.1 \times 10^{-03}$ | --           |
| <b>270.0751</b> | 1.53 | 0.13  | 0.07; 0.19   | $5.6 \times 10^{-05}$ | 0.06  | 0.02; 0.11   | $6.9 \times 10^{-03}$ | --           |
| <b>283.1531</b> | 2.77 | 0.16  | 0.10; 0.22   | $6.3 \times 10^{-07}$ | 0.06  | 0.02; 0.11   | $5.4 \times 10^{-03}$ | --           |
| <b>285.1711</b> | 2.66 | 0.12  | 0.06; 0.18   | $1.2 \times 10^{-04}$ | 0.06  | 0.01; 0.10   | $1.4 \times 10^{-02}$ | --           |
| <b>287.2231</b> | 6.08 | 0.12  | 0.06; 0.19   | $5.6 \times 10^{-05}$ | 0.07  | 0.03; 0.12   | $1.8 \times 10^{-03}$ | --           |
| <b>289.1475</b> | 3.94 | 0.11  | 0.06; 0.17   | $1.7 \times 10^{-04}$ | 0.06  | 0.01; 0.10   | $1.1 \times 10^{-02}$ | --           |
| <b>291.1241</b> | 2.09 | 0.08  | 0.02; 0.15   | $8.8 \times 10^{-03}$ | 0.05  | 0.01; 0.10   | $1.8 \times 10^{-02}$ | --           |
| <b>295.153</b>  | 3.32 | 0.13  | 0.07; 0.20   | $2.4 \times 10^{-05}$ | 0.06  | 0.01; 0.10   | $1.5 \times 10^{-02}$ | --           |
| <b>295.1531</b> | 3.24 | 0.08  | 0.02; 0.14   | $1.4 \times 10^{-02}$ | 0.08  | 0.03; 0.12   | $7.5 \times 10^{-04}$ | --           |
| <b>295.189</b>  | 3.32 | 0.08  | 0.02; 0.14   | $1.1 \times 10^{-02}$ | 0.06  | 0.01; 0.10   | $1.1 \times 10^{-02}$ | --           |
| <b>297.1702</b> | 4.42 | 0.12  | 0.06; 0.18   | $1.4 \times 10^{-04}$ | 0.07  | 0.03; 0.12   | $2.3 \times 10^{-03}$ | --           |
| <b>300.2004</b> | 2.73 | 0.1   | 0.04; 0.16   | $1.4 \times 10^{-03}$ | 0.06  | 0.01; 0.10   | $1.5 \times 10^{-02}$ | --           |
| <b>307.0292</b> | 1.81 | 0.18  | 0.12; 0.24   | $7.6 \times 10^{-09}$ | 0.09  | 0.05; 0.13   | $7.0 \times 10^{-05}$ | --           |
| <b>307.0317</b> | 1.7  | 0.18  | 0.12; 0.24   | $7.6 \times 10^{-09}$ | 0.07  | 0.03; 0.12   | $2.0 \times 10^{-03}$ | --           |
| <b>307.1199</b> | 2.04 | 0.1   | 0.04; 0.16   | $8.0 \times 10^{-04}$ | 0.08  | 0.04; 0.12   | $3.1 \times 10^{-04}$ | --           |
| <b>307.2281</b> | 6.28 | 0.14  | 0.08; 0.21   | $5.0 \times 10^{-06}$ | 0.07  | 0.02; 0.11   | $3.4 \times 10^{-03}$ | --           |
| <b>311.2231</b> | 3.02 | 0.16  | 0.10; 0.22   | $4.7 \times 10^{-07}$ | 0.06  | 0.02; 0.11   | $5.0 \times 10^{-03}$ | --           |
| <b>313.1488</b> | 3.96 | 0.13  | 0.07; 0.19   | $2.0 \times 10^{-05}$ | 0.07  | 0.02; 0.11   | $2.4 \times 10^{-03}$ | --           |
| <b>313.2387</b> | 3.46 | 0.14  | 0.08; 0.20   | $3.0 \times 10^{-06}$ | 0.07  | 0.02; 0.11   | $2.3 \times 10^{-03}$ | 12,13-diHOME |
| <b>313.2387</b> | 3.59 | 0.13  | 0.06; 0.19   | $5.9 \times 10^{-05}$ | 0.06  | 0.01; 0.10   | $9.6 \times 10^{-03}$ | 9,10-diHOME  |
| <b>314.1013</b> | 2    | 0.12  | 0.06; 0.18   | $2.3 \times 10^{-04}$ | 0.06  | 0.01; 0.10   | $1.1 \times 10^{-02}$ | --           |
| <b>315.164</b>  | 4.68 | 0.16  | 0.10; 0.22   | $3.4 \times 10^{-07}$ | 0.06  | 0.01; 0.10   | $1.4 \times 10^{-02}$ | --           |
| <b>317.2255</b> | 6.72 | -0.09 | -0.16; -0.03 | $3.0 \times 10^{-03}$ | -0.06 | -0.11; -0.02 | $5.9 \times 10^{-03}$ | --           |
| <b>318.1743</b> | 2.1  | -0.1  | -0.17; -0.04 | $7.6 \times 10^{-04}$ | -0.08 | -0.12; -0.03 | $5.6 \times 10^{-04}$ | --           |
| <b>319.1542</b> | 4.41 | 0.11  | 0.05; 0.17   | $5.4 \times 10^{-04}$ | 0.07  | 0.03; 0.12   | $1.1 \times 10^{-03}$ | --           |
| <b>320.1953</b> | 3.61 | 0.08  | 0.02; 0.15   | $7.5 \times 10^{-03}$ | 0.08  | 0.03; 0.12   | $1.0 \times 10^{-03}$ | --           |
| <b>323.1864</b> | 4.44 | 0.1   | 0.04; 0.16   | $1.9 \times 10^{-03}$ | 0.07  | 0.03; 0.12   | $1.8 \times 10^{-03}$ | --           |

|                 |      |       |              |                       |       |              |                       |    |                 |
|-----------------|------|-------|--------------|-----------------------|-------|--------------|-----------------------|----|-----------------|
| <b>323.2234</b> | 4.08 | 0.13  | 0.07; 0.19   | $2.1 \times 10^{-05}$ | 0.07  | 0.03; 0.12   | $1.3 \times 10^{-03}$ | -- |                 |
| <b>325.2726</b> | 5.72 | 0.1   | 0.04; 0.16   | $1.2 \times 10^{-03}$ | 0.08  | 0.03; 0.12   | $5.0 \times 10^{-04}$ | -- |                 |
| <b>327.2907</b> | 6.06 | 0.1   | 0.04; 0.16   | $1.2 \times 10^{-03}$ | 0.06  | 0.02; 0.11   | $7.6 \times 10^{-03}$ | -- |                 |
| <b>333.1398</b> | 4.42 | 0.1   | 0.04; 0.17   | $1.2 \times 10^{-03}$ | 0.06  | 0.02; 0.11   | $8.1 \times 10^{-03}$ | -- |                 |
| <b>341.2703</b> | 3.72 | 0.22  | 0.16; 0.29   | $1.6 \times 10^{-12}$ | 0.13  | 0.08; 0.17   | $1.2 \times 10^{-08}$ | -- |                 |
| <b>343.2856</b> | 4.3  | 0.23  | 0.17; 0.30   | $8.0 \times 10^{-14}$ | 0.11  | 0.06; 0.15   | $1.9 \times 10^{-06}$ | -- |                 |
| <b>343.2858</b> | 3.97 | 0.09  | 0.02; 0.15   | $7.1 \times 10^{-03}$ | 0.06  | 0.02; 0.11   | $6.9 \times 10^{-03}$ | -- |                 |
| <b>346.1791</b> | 1.85 | 0.12  | 0.05; 0.18   | $2.1 \times 10^{-04}$ | 0.06  | 0.01; 0.10   | $1.4 \times 10^{-02}$ | -- |                 |
| <b>359.28</b>   | 3.32 | 0.15  | 0.09; 0.21   | $2.3 \times 10^{-06}$ | 0.06  | 0.02; 0.11   | $3.6 \times 10^{-03}$ | -- |                 |
| <b>387.2758</b> | 6.2  | -0.13 | -0.19; -0.07 | $1.4 \times 10^{-05}$ | -0.06 | -0.10; -0.02 | $6.9 \times 10^{-03}$ | -- |                 |
| <b>393.2679</b> | 2.31 | -0.1  | -0.16; -0.04 | $9.5 \times 10^{-04}$ | -0.07 | -0.11; -0.02 | $4.5 \times 10^{-03}$ | -- |                 |
| <b>398.213</b>  | 4.95 | 0.1   | 0.04; 0.16   | $1.3 \times 10^{-03}$ | 0.08  | 0.03; 0.12   | $5.6 \times 10^{-04}$ | -- |                 |
| <b>411.1939</b> | 1.98 | -0.08 | -0.14; -0.02 | $5.8 \times 10^{-03}$ | -0.05 | -0.09; -0.01 | $1.8 \times 10^{-02}$ | -- |                 |
| <b>413.2009</b> | 1.67 | -0.09 | -0.15; -0.03 | $4.0 \times 10^{-03}$ | -0.06 | -0.10; -0.01 | $9.7 \times 10^{-03}$ | -- |                 |
| <b>415.3093</b> | 6.5  | -0.12 | -0.18; -0.06 | $1.6 \times 10^{-04}$ | -0.05 | -0.10; -0.01 | $1.8 \times 10^{-02}$ | -- | Oleoyl-glycerol |
| <b>415.3229</b> | 6.36 | 0.1   | 0.04; 0.16   | $1.7 \times 10^{-03}$ | 0.06  | 0.02; 0.11   | $4.7 \times 10^{-03}$ | -- |                 |
| <b>417.2658</b> | 3.69 | -0.09 | -0.16; -0.03 | $2.6 \times 10^{-03}$ | -0.08 | -0.13; -0.04 | $1.6 \times 10^{-04}$ | -- |                 |
| <b>417.3002</b> | 6.43 | -0.08 | -0.14; -0.02 | $7.6 \times 10^{-03}$ | -0.05 | -0.10; -0.01 | $1.6 \times 10^{-02}$ | -- |                 |
| <b>419.2079</b> | 1.4  | 0.1   | 0.04; 0.17   | $9.2 \times 10^{-04}$ | 0.06  | 0.02; 0.10   | $7.4 \times 10^{-03}$ | -- | Cortisone       |
| <b>429.2088</b> | 1.56 | -0.09 | -0.15; -0.03 | $3.5 \times 10^{-03}$ | -0.07 | -0.12; -0.03 | $1.3 \times 10^{-03}$ | -- |                 |
| <b>431.317</b>  | 4.61 | -0.08 | -0.14; -0.02 | $9.2 \times 10^{-03}$ | -0.06 | -0.10; -0.02 | $5.7 \times 10^{-03}$ | -- |                 |
| <b>443.1562</b> | 2.2  | 0.11  | 0.04; 0.17   | $1.0 \times 10^{-03}$ | 0.05  | 0.01; 0.10   | $1.7 \times 10^{-02}$ | -- |                 |
| <b>443.1562</b> | 2.29 | 0.08  | 0.02; 0.14   | $1.2 \times 10^{-02}$ | 0.06  | 0.01; 0.10   | $9.7 \times 10^{-03}$ | -- |                 |
| <b>444.1599</b> | 2.22 | 0.11  | 0.05; 0.17   | $4.9 \times 10^{-04}$ | 0.06  | 0.02; 0.10   | $8.8 \times 10^{-03}$ | -- |                 |
| <b>445.2957</b> | 3.92 | -0.11 | -0.18; -0.05 | $2.6 \times 10^{-04}$ | -0.09 | -0.13; -0.04 | $7.8 \times 10^{-05}$ | -- |                 |
| <b>446.2902</b> | 2.73 | -0.09 | -0.15; -0.03 | $5.6 \times 10^{-03}$ | -0.06 | -0.10; -0.01 | $1.4 \times 10^{-02}$ | -- |                 |
| <b>446.3008</b> | 3.91 | -0.12 | -0.18; -0.06 | $7.8 \times 10^{-05}$ | -0.08 | -0.12; -0.03 | $6.8 \times 10^{-04}$ | -- |                 |
| <b>447.3121</b> | 6.28 | 0.13  | 0.07; 0.19   | $3.6 \times 10^{-05}$ | 0.08  | 0.03; 0.12   | $1.0 \times 10^{-03}$ | -- |                 |
| <b>449.2906</b> | 2.65 | -0.09 | -0.16; -0.03 | $3.5 \times 10^{-03}$ | -0.06 | -0.11; -0.02 | $7.9 \times 10^{-03}$ | -- |                 |
| <b>457.2808</b> | 3.57 | -0.09 | -0.16; -0.03 | $2.5 \times 10^{-03}$ | -0.06 | -0.10; -0.02 | $8.4 \times 10^{-03}$ | -- |                 |



|                 |      |       |              |                       |       |              |                       |    |                                 |
|-----------------|------|-------|--------------|-----------------------|-------|--------------|-----------------------|----|---------------------------------|
| <b>457.3313</b> | 5.26 | 0.09  | 0.02; 0.15   | $6.8 \times 10^{-03}$ | 0.06  | 0.01; 0.10   | $1.3 \times 10^{-02}$ | -- |                                 |
| <b>462.2869</b> | 2.08 | -0.08 | -0.14; -0.02 | $7.5 \times 10^{-03}$ | -0.06 | -0.10; -0.01 | $1.6 \times 10^{-02}$ | -- |                                 |
| <b>474.2872</b> | 2.65 | -0.11 | -0.17; -0.05 | $7.2 \times 10^{-04}$ | -0.07 | -0.11; -0.03 | $1.2 \times 10^{-03}$ | -- |                                 |
| <b>475.343</b>  | 5.68 | 0.12  | 0.06; 0.18   | $9.8 \times 10^{-05}$ | 0.08  | 0.04; 0.13   | $2.4 \times 10^{-04}$ | -- |                                 |
| <b>475.3434</b> | 4.76 | -0.09 | -0.15; -0.02 | $6.5 \times 10^{-03}$ | -0.05 | -0.10; -0.01 | $1.7 \times 10^{-02}$ | -- |                                 |
| <b>476.156</b>  | 1.36 | 0.09  | 0.02; 0.15   | $6.6 \times 10^{-03}$ | 0.06  | 0.02; 0.11   | $6.8 \times 10^{-03}$ | -- | Oxymorphone<br>3b-D-glucuronide |
| <b>479.3403</b> | 3.94 | -0.13 | -0.19; -0.07 | $2.8 \times 10^{-05}$ | -0.06 | -0.10; -0.01 | $1.1 \times 10^{-02}$ | -- |                                 |
| <b>489.197</b>  | 1.91 | 0.09  | 0.03; 0.15   | $4.9 \times 10^{-03}$ | 0.06  | 0.02; 0.11   | $6.7 \times 10^{-03}$ | -- |                                 |
| <b>493.3492</b> | 4.4  | 0.09  | 0.03; 0.16   | $3.8 \times 10^{-03}$ | 0.06  | 0.02; 0.10   | $4.8 \times 10^{-03}$ | -- |                                 |
| <b>497.2762</b> | 2.12 | 0.14  | 0.07; 0.20   | $1.9 \times 10^{-05}$ | 0.07  | 0.02; 0.11   | $4.0 \times 10^{-03}$ | -- |                                 |
| <b>497.2791</b> | 1.36 | 0.15  | 0.09; 0.22   | $1.8 \times 10^{-06}$ | 0.06  | 0.02; 0.11   | $5.4 \times 10^{-03}$ | -- |                                 |
| <b>497.3495</b> | 2.7  | -0.14 | -0.20; -0.08 | $6.9 \times 10^{-06}$ | -0.06 | -0.10; -0.01 | $1.3 \times 10^{-02}$ | -- |                                 |
| <b>503.3233</b> | 3.35 | 0.09  | 0.03; 0.15   | $4.3 \times 10^{-03}$ | 0.05  | 0.01; 0.09   | $1.7 \times 10^{-02}$ | -- |                                 |
| <b>504.3162</b> | 4.6  | 0.13  | 0.07; 0.19   | $2.7 \times 10^{-05}$ | 0.07  | 0.02; 0.11   | $3.4 \times 10^{-03}$ | -- | LysoPC(15:0)                    |
| <b>507.3339</b> | 3.08 | 0.15  | 0.09; 0.21   | $3.7 \times 10^{-06}$ | 0.07  | 0.03; 0.12   | $1.5 \times 10^{-03}$ | -- |                                 |
| <b>508.308</b>  | 2.64 | -0.16 | -0.22; -0.10 | $1.4 \times 10^{-07}$ | -0.08 | -0.12; -0.04 | $2.5 \times 10^{-04}$ | -- |                                 |
| <b>509.2371</b> | 2.24 | 0.1   | 0.04; 0.17   | $1.0 \times 10^{-03}$ | 0.06  | 0.01; 0.10   | $1.5 \times 10^{-02}$ | -- |                                 |
| <b>509.2386</b> | 2.2  | 0.1   | 0.04; 0.17   | $1.0 \times 10^{-03}$ | 0.06  | 0.02; 0.11   | $7.4 \times 10^{-03}$ | -- |                                 |
| <b>511.4187</b> | 6.84 | 0.09  | 0.03; 0.15   | $4.0 \times 10^{-03}$ | 0.06  | 0.01; 0.10   | $1.4 \times 10^{-02}$ | -- |                                 |
| <b>515.2827</b> | 1.91 | 0.08  | 0.02; 0.15   | $7.2 \times 10^{-03}$ | 0.06  | 0.01; 0.10   | $1.3 \times 10^{-02}$ | -- |                                 |
| <b>515.3282</b> | 3.69 | 0.11  | 0.05; 0.17   | $4.4 \times 10^{-04}$ | 0.08  | 0.03; 0.12   | $9.6 \times 10^{-04}$ | -- |                                 |
| <b>519.3196</b> | 2.66 | 0.14  | 0.08; 0.20   | $8.1 \times 10^{-06}$ | 0.06  | 0.02; 0.10   | $7.8 \times 10^{-03}$ | -- |                                 |
| <b>525.2711</b> | 1.87 | -0.1  | -0.16; -0.03 | $2.3 \times 10^{-03}$ | -0.09 | -0.13; -0.05 | $5.6 \times 10^{-05}$ | -- |                                 |
| <b>532.2527</b> | 4.17 | -0.12 | -0.18; -0.06 | $1.3 \times 10^{-04}$ | -0.08 | -0.12; -0.04 | $1.1 \times 10^{-04}$ | -- |                                 |
| <b>533.334</b>  | 2.92 | 0.11  | 0.05; 0.18   | $3.9 \times 10^{-04}$ | 0.06  | 0.02; 0.11   | $5.2 \times 10^{-03}$ | -- |                                 |
| <b>537.329</b>  | 1.91 | 0.08  | 0.02; 0.14   | $9.1 \times 10^{-03}$ | 0.09  | 0.04; 0.13   | $1.2 \times 10^{-04}$ | -- |                                 |
| <b>537.3295</b> | 2.01 | 0.1   | 0.05; 0.16   | $4.8 \times 10^{-04}$ | 0.05  | 0.01; 0.09   | $9.0 \times 10^{-03}$ | -- |                                 |
| <b>541.2657</b> | 1.4  | -0.12 | -0.18; -0.06 | $6.1 \times 10^{-05}$ | -0.06 | -0.11; -0.02 | $6.5 \times 10^{-03}$ | -- |                                 |
| <b>543.2787</b> | 1.24 | -0.16 | -0.22; -0.10 | $3.1 \times 10^{-07}$ | -0.07 | -0.11; -0.02 | $3.7 \times 10^{-03}$ | -- |                                 |

|                 |      |       |              |                       |       |              |                       |    |
|-----------------|------|-------|--------------|-----------------------|-------|--------------|-----------------------|----|
| <b>553.4885</b> | 6.67 | -0.1  | -0.16; -0.04 | $1.3 \times 10^{-03}$ | -0.06 | -0.11; -0.02 | $7.0 \times 10^{-03}$ | -- |
| <b>555.3118</b> | 4.59 | 0.15  | 0.09; 0.22   | $8.7 \times 10^{-07}$ | 0.1   | 0.05; 0.14   | $1.3 \times 10^{-05}$ | -- |
| <b>557.3039</b> | 4.59 | 0.18  | 0.12; 0.24   | $8.1 \times 10^{-09}$ | 0.07  | 0.03; 0.12   | $1.1 \times 10^{-03}$ | -- |
| <b>564.3362</b> | 4.81 | 0.12  | 0.06; 0.18   | $1.4 \times 10^{-04}$ | 0.05  | 0.01; 0.10   | $1.8 \times 10^{-02}$ | -- |
| <b>564.368</b>  | 4.26 | -0.13 | -0.19; -0.07 | $2.1 \times 10^{-05}$ | -0.06 | -0.10; -0.01 | $1.0 \times 10^{-02}$ | -- |
| <b>575.3607</b> | 4.63 | 0.1   | 0.04; 0.16   | $1.9 \times 10^{-03}$ | 0.08  | 0.04; 0.13   | $3.5 \times 10^{-04}$ | -- |
| <b>577.3763</b> | 4.53 | -0.12 | -0.18; -0.06 | $8.6 \times 10^{-05}$ | -0.06 | -0.10; -0.01 | $1.3 \times 10^{-02}$ | -- |
| <b>578.3502</b> | 4.57 | 0.14  | 0.08; 0.20   | $2.2 \times 10^{-06}$ | 0.08  | 0.03; 0.12   | $4.6 \times 10^{-04}$ | -- |
| <b>582.271</b>  | 4.66 | -0.11 | -0.18; -0.05 | $2.1 \times 10^{-04}$ | -0.06 | -0.11; -0.02 | $4.6 \times 10^{-03}$ | -- |
| <b>582.3783</b> | 6.2  | 0.08  | 0.02; 0.14   | $1.4 \times 10^{-02}$ | 0.06  | 0.01; 0.10   | $1.6 \times 10^{-02}$ | -- |
| <b>594.3428</b> | 2.42 | 0.12  | 0.05; 0.18   | $2.7 \times 10^{-04}$ | 0.06  | 0.02; 0.10   | $8.4 \times 10^{-03}$ | -- |
| <b>594.3488</b> | 2.48 | 0.1   | 0.04; 0.16   | $1.6 \times 10^{-03}$ | 0.07  | 0.02; 0.11   | $2.6 \times 10^{-03}$ | -- |
| <b>598.3736</b> | 3.26 | 0.09  | 0.03; 0.15   | $3.0 \times 10^{-03}$ | 0.06  | 0.01; 0.10   | $1.3 \times 10^{-02}$ | -- |
| <b>598.3744</b> | 3.19 | 0.09  | 0.03; 0.15   | $3.0 \times 10^{-03}$ | 0.06  | 0.01; 0.10   | $8.9 \times 10^{-03}$ | -- |
| <b>599.3444</b> | 1.83 | -0.12 | -0.18; -0.06 | $1.1 \times 10^{-04}$ | -0.06 | -0.10; -0.01 | $1.3 \times 10^{-02}$ | -- |
| <b>605.4063</b> | 6.74 | 0.08  | 0.02; 0.14   | $5.7 \times 10^{-03}$ | 0.09  | 0.05; 0.14   | $1.5 \times 10^{-05}$ | -- |
| <b>611.3527</b> | 2.01 | -0.08 | -0.14; -0.02 | $1.4 \times 10^{-02}$ | -0.07 | -0.12; -0.03 | $1.2 \times 10^{-03}$ | -- |
| <b>611.3807</b> | 3.45 | -0.12 | -0.18; -0.06 | $1.4 \times 10^{-04}$ | -0.06 | -0.10; -0.01 | $1.3 \times 10^{-02}$ | -- |
| <b>611.3808</b> | 3.37 | -0.12 | -0.18; -0.06 | $1.9 \times 10^{-04}$ | -0.07 | -0.12; -0.03 | $8.0 \times 10^{-04}$ | -- |
| <b>611.3809</b> | 3.18 | -0.1  | -0.16; -0.04 | $1.3 \times 10^{-03}$ | -0.07 | -0.11; -0.03 | $1.3 \times 10^{-03}$ | -- |
| <b>611.3813</b> | 2.97 | -0.12 | -0.18; -0.06 | $1.1 \times 10^{-04}$ | -0.08 | -0.12; -0.03 | $7.8 \times 10^{-04}$ | -- |
| <b>613.3591</b> | 2.06 | -0.1  | -0.16; -0.04 | $1.5 \times 10^{-03}$ | -0.06 | -0.10; -0.01 | $1.1 \times 10^{-02}$ | -- |
| <b>613.3866</b> | 2.95 | -0.13 | -0.19; -0.07 | $2.5 \times 10^{-05}$ | -0.06 | -0.11; -0.02 | $4.0 \times 10^{-03}$ | -- |
| <b>616.2999</b> | 4.59 | 0.12  | 0.06; 0.18   | $7.9 \times 10^{-05}$ | 0.07  | 0.03; 0.12   | $1.3 \times 10^{-03}$ | -- |
| <b>621.3285</b> | 3.58 | 0.08  | 0.02; 0.15   | $6.8 \times 10^{-03}$ | 0.06  | 0.01; 0.10   | $9.0 \times 10^{-03}$ | -- |
| <b>623.2711</b> | 1.37 | -0.15 | -0.21; -0.08 | $2.9 \times 10^{-06}$ | -0.07 | -0.12; -0.03 | $1.4 \times 10^{-03}$ | -- |
| <b>625.3549</b> | 2.41 | -0.09 | -0.15; -0.03 | $2.1 \times 10^{-03}$ | -0.07 | -0.11; -0.03 | $1.1 \times 10^{-03}$ | -- |
| <b>626.3601</b> | 2.41 | -0.1  | -0.16; -0.04 | $1.5 \times 10^{-03}$ | -0.06 | -0.10; -0.02 | $5.3 \times 10^{-03}$ | -- |
| <b>627.3758</b> | 2.45 | -0.08 | -0.14; -0.02 | $9.8 \times 10^{-03}$ | -0.07 | -0.11; -0.02 | $3.8 \times 10^{-03}$ | -- |
| <b>634.2473</b> | 4.1  | 0.09  | 0.03; 0.15   | $5.2 \times 10^{-03}$ | 0.07  | 0.02; 0.11   | $4.1 \times 10^{-03}$ | -- |

|                 |      |      |              |                       |       |              |                       |    |
|-----------------|------|------|--------------|-----------------------|-------|--------------|-----------------------|----|
| <b>635.38</b>   | 6.35 | 0.15 | 0.08; 0.21   | 4.0x10 <sup>-06</sup> | 0.1   | 0.06; 0.15   | 9.0x10 <sup>-06</sup> | -- |
| <b>635.5287</b> | 6.49 | -0.1 | -0.16; -0.04 | 1.8x10 <sup>-03</sup> | -0.06 | -0.11; -0.02 | 3.7x10 <sup>-03</sup> | -- |
| <b>636.2644</b> | 4.59 | 0.11 | 0.05; 0.17   | 6.7x10 <sup>-04</sup> | 0.08  | 0.04; 0.12   | 3.7x10 <sup>-04</sup> | -- |
| <b>648.3896</b> | 6.06 | 0.17 | 0.11; 0.23   | 3.3x10 <sup>-08</sup> | 0.06  | 0.02; 0.11   | 4.5x10 <sup>-03</sup> | -- |

BAL – Bioactive lipid; m/z – mass to charge ratio; rt – retention time. \*Unadjusted P-value

**Table S2.** 95% Confidence Intervals from original linear regression model and after bootstrapped replication for BALs which residuals were non-normally distributed and measured values failed to be significantly different in high PA levels vs. low PA.

| Study      | Bioactive Lipid (m/z rt) | Original 95%CI | Bootstrapped 95%CI |
|------------|--------------------------|----------------|--------------------|
| VITAL-CTSC | 295.1528 3.17            | 0.016; 0.141   | 0.014; 0.137       |
|            | 237.1494 3.90            | 0.024; 0.149   | 0.026; 0.154       |
|            | 253.1441 2.69            | 0.027; 0.153   | 0.024; 0.153       |
| JUPITER-NC | 359.2800 3.32            | 0.020; 0.101   | 0.021; 0.105       |
|            | 457.3313 5.26            | 0.012; 0.099   | 0.011; 0.098       |
|            | 225.1130 1.87            | 0.010; 0.097   | 0.012; 0.093       |

**Table S3.**  $\beta$  coefficients and 95% confidence interval from model 3 (adjusted for age, sex, race/ethnicity, LDL-C, total-C, smoking, BMI categories, and HDL) of 45 BAL significantly associated with PA in VITAL-CTSC (FDR <.1) and validated in JUPITER-NC (nominal P < .05)

| BAL <i>m/z</i> | rt   | VITAL-CTSC          |              |                       | JUPITER-NC          |              |                       | Annotation   |
|----------------|------|---------------------|--------------|-----------------------|---------------------|--------------|-----------------------|--------------|
|                |      | $\beta$ coefficient | 95% CI       | P-value*              | $\beta$ coefficient | 95% CI       | P-value*              |              |
| 228.1600       | 2.53 | 0.12                | 0.06; 0.19   | 1.1x10 <sup>-04</sup> | 0.08                | 0.04; 0.12   | 1.9x10 <sup>-04</sup> | --           |
| 237.1495       | 3.23 | 0.1                 | 0.04; 0.16   | 1.9x10 <sup>-03</sup> | 0.09                | 0.04; 0.13   | 1.0x10 <sup>-04</sup> | --           |
| 241.1808       | 4.64 | 0.11                | 0.05; 0.18   | 3.8x10 <sup>-04</sup> | 0.05                | 0.00; 0.09   | 3.3x10 <sup>-02</sup> | --           |
| 257.1759       | 2.86 | 0.11                | 0.05; 0.17   | 4.6x10 <sup>-04</sup> | 0.06                | 0.01; 0.10   | 1.3x10 <sup>-02</sup> | --           |
| 257.1761       | 2.81 | 0.11                | 0.05; 0.17   | 4.6x10 <sup>-04</sup> | 0.06                | 0.02; 0.10   | 7.3x10 <sup>-03</sup> | --           |
| 257.1762       | 2.89 | 0.11                | 0.05; 0.17   | 4.6x10 <sup>-04</sup> | 0.09                | 0.05; 0.13   | 4.3x10 <sup>-05</sup> | --           |
| 265.1813       | 5.28 | 0.1                 | 0.04; 0.17   | 1.1x10 <sup>-03</sup> | 0.08                | 0.04; 0.12   | 3.6x10 <sup>-04</sup> | --           |
| 267.1241       | 3.06 | 0.11                | 0.05; 0.18   | 6.3x10 <sup>-04</sup> | 0.05                | 0.01; 0.09   | 9.6x10 <sup>-03</sup> | --           |
| 285.1711       | 2.66 | 0.1                 | 0.04; 0.16   | 1.7x10 <sup>-03</sup> | 0.07                | 0.02; 0.11   | 2.6x10 <sup>-03</sup> | --           |
| 287.2231       | 6.08 | 0.11                | 0.05; 0.18   | 3.4x10 <sup>-04</sup> | 0.07                | 0.03; 0.11   | 2.1x10 <sup>-03</sup> | --           |
| 289.1475       | 3.94 | 0.11                | 0.05; 0.17   | 3.7x10 <sup>-04</sup> | 0.06                | 0.02; 0.10   | 5.2x10 <sup>-03</sup> | --           |
| 307.0292       | 1.81 | 0.17                | 0.10; 0.23   | 2.6x10 <sup>-07</sup> | 0.08                | 0.04; 0.12   | 3.1x10 <sup>-04</sup> | --           |
| 307.0317       | 1.7  | 0.17                | 0.10; 0.23   | 2.6x10 <sup>-07</sup> | 0.06                | 0.02; 0.11   | 3.8x10 <sup>-03</sup> | --           |
| 307.2281       | 6.28 | 0.13                | 0.07; 0.20   | 3.4x10 <sup>-05</sup> | 0.07                | 0.03; 0.11   | 1.7x10 <sup>-03</sup> | --           |
| 311.2231       | 3.02 | 0.13                | 0.06; 0.19   | 8.9x10 <sup>-05</sup> | 0.05                | 0.01; 0.10   | 1.2x10 <sup>-02</sup> | --           |
| 313.1488       | 3.96 | 0.11                | 0.05; 0.18   | 3.0x10 <sup>-04</sup> | 0.07                | 0.03; 0.11   | 1.2x10 <sup>-03</sup> | --           |
| 313.2387       | 3.46 | 0.11                | 0.05; 0.17   | 3.4x10 <sup>-04</sup> | 0.07                | 0.02; 0.11   | 3.4x10 <sup>-03</sup> | 12,13-diHOME |
| 315.1640       | 4.68 | 0.13                | 0.07; 0.20   | 2.1x10 <sup>-05</sup> | 0.07                | 0.02; 0.11   | 2.6x10 <sup>-03</sup> | --           |
| 317.2255       | 6.72 | -0.11               | -0.17; -0.04 | 1.0x10 <sup>-03</sup> | -0.05               | -0.09; -0.01 | 1.0x10 <sup>-02</sup> | --           |
| 323.2234       | 4.08 | 0.12                | 0.06; 0.18   | 2.2x10 <sup>-04</sup> | 0.07                | 0.02; 0.11   | 3.4x10 <sup>-03</sup> | --           |
| 341.2703       | 3.72 | 0.11                | 0.05; 0.16   | 1.8x10 <sup>-04</sup> | 0.1                 | 0.06; 0.14   | 4.9x10 <sup>-06</sup> | --           |
| 343.2491       | 4.25 | 0.13                | 0.07; 0.20   | 2.9x10 <sup>-05</sup> | 0.05                | 0.01; 0.09   | 1.6x10 <sup>-02</sup> | --           |
| 343.2856       | 4.3  | 0.12                | 0.06; 0.18   | 2.7x10 <sup>-05</sup> | 0.08                | 0.04; 0.12   | 2.4x10 <sup>-04</sup> | --           |
| 349.1273       | 3.06 | 0.1                 | 0.04; 0.17   | 1.3x10 <sup>-03</sup> | 0.05                | 0.01; 0.09   | 7.0x10 <sup>-03</sup> | --           |

|                 |      |       |              |                       |       |              |                       |    |
|-----------------|------|-------|--------------|-----------------------|-------|--------------|-----------------------|----|
| <b>365.0946</b> | 3.06 | 0.11  | 0.05; 0.17   | 7.5x10 <sup>-04</sup> | 0.05  | 0.01; 0.09   | 1.6x10 <sup>-02</sup> | -- |
| <b>398.2130</b> | 4.95 | 0.11  | 0.04; 0.17   | 8.1x10 <sup>-04</sup> | 0.07  | 0.03; 0.11   | 7.4x10 <sup>-04</sup> | -- |
| <b>425.3365</b> | 6.44 | 0.11  | 0.04; 0.17   | 1.1x10 <sup>-03</sup> | 0.05  | 0.00; 0.09   | 3.1x10 <sup>-02</sup> | -- |
| <b>441.3334</b> | 3.48 | 0.11  | 0.05; 0.17   | 7.0x10 <sup>-04</sup> | 0.05  | 0.01; 0.10   | 1.1x10 <sup>-02</sup> | -- |
| <b>443.1562</b> | 2.2  | 0.12  | 0.05; 0.18   | 4.2x10 <sup>-04</sup> | 0.06  | 0.02; 0.10   | 3.6x10 <sup>-03</sup> | -- |
| <b>443.1562</b> | 2.29 | 0.11  | 0.04; 0.17   | 1.2x10 <sup>-03</sup> | 0.06  | 0.02; 0.11   | 2.1x10 <sup>-03</sup> | -- |
| <b>444.1599</b> | 2.22 | 0.12  | 0.06; 0.19   | 2.5x10 <sup>-04</sup> | 0.06  | 0.02; 0.10   | 2.6x10 <sup>-03</sup> | -- |
| <b>447.3121</b> | 6.28 | 0.12  | 0.06; 0.18   | 2.2x10 <sup>-04</sup> | 0.08  | 0.03; 0.12   | 5.5x10 <sup>-04</sup> | -- |
| <b>463.2344</b> | 1.63 | -0.09 | -0.15; -0.04 | 1.9x10 <sup>-03</sup> | -0.03 | -0.07; 0.00  | 4.2x10 <sup>-02</sup> | -- |
| <b>469.2835</b> | 2.99 | 0.11  | 0.04; 0.17   | 1.0x10 <sup>-03</sup> | 0.05  | 0.01; 0.10   | 1.5x10 <sup>-02</sup> | -- |
| <b>497.2762</b> | 2.12 | 0.13  | 0.07; 0.19   | 6.6x10 <sup>-05</sup> | 0.06  | 0.02; 0.11   | 6.6x10 <sup>-03</sup> | -- |
| <b>497.2762</b> | 1.85 | 0.1   | 0.04; 0.17   | 1.6x10 <sup>-03</sup> | 0.05  | 0.01; 0.10   | 2.1x10 <sup>-02</sup> | -- |
| <b>497.2768</b> | 2.07 | 0.13  | 0.07; 0.19   | 6.6x10 <sup>-05</sup> | 0.04  | 0.00; 0.08   | 4.5x10 <sup>-02</sup> | -- |
| <b>497.2791</b> | 1.36 | 0.12  | 0.06; 0.19   | 1.8x10 <sup>-04</sup> | 0.05  | 0.01; 0.09   | 2.2x10 <sup>-02</sup> | -- |
| <b>515.3282</b> | 3.69 | 0.11  | 0.04; 0.17   | 1.4x10 <sup>-03</sup> | 0.07  | 0.02; 0.11   | 3.0x10 <sup>-03</sup> | -- |
| <b>533.3340</b> | 2.92 | 0.11  | 0.04; 0.17   | 1.3x10 <sup>-03</sup> | 0.06  | 0.01; 0.10   | 9.8x10 <sup>-03</sup> | -- |
| <b>557.2396</b> | 3.06 | 0.11  | 0.04; 0.17   | 8.3x10 <sup>-04</sup> | 0.05  | 0.01; 0.09   | 1.8x10 <sup>-02</sup> | -- |
| <b>557.3039</b> | 4.59 | 0.1   | 0.04; 0.16   | 6.5x10 <sup>-04</sup> | 0.04  | 0.01; 0.07   | 5.2x10 <sup>-03</sup> | -- |
| <b>575.3607</b> | 4.63 | 0.1   | 0.03; 0.16   | 2.8x10 <sup>-03</sup> | 0.07  | 0.03; 0.11   | 8.0x10 <sup>-04</sup> | -- |
| <b>582.2710</b> | 4.66 | -0.1  | -0.16; -0.04 | 1.3x10 <sup>-03</sup> | -0.05 | -0.08; -0.01 | 7.5x10 <sup>-03</sup> | -- |
| <b>635.3800</b> | 6.35 | 0.12  | 0.06; 0.18   | 2.6x10 <sup>-04</sup> | 0.09  | 0.05; 0.13   | 4.5x10 <sup>-05</sup> | -- |

BAL – Bioactive lipid; m/z – mass to charge ratio; rt – retention time. \*Unadjusted P-value

**Table S4.** Two-sample Mendelian randomization results for associations between each BAL-SNPs combination and CHD

| BAL <i>m/z</i> rt    | $\beta$ -coefficient | P-value*              | N of variants | Variants included                    |
|----------------------|----------------------|-----------------------|---------------|--------------------------------------|
| <b>613.3866 2.95</b> | -0.07                | 2.4x10 <sup>-04</sup> | 2             | †rs11045856, †rs12367888             |
| <b>613.3591 2.06</b> | -0.07                | 3.3x10 <sup>-04</sup> | 2             | †rs11045856, †rs12367888             |
| <b>611.3807 3.45</b> | -0.05                | 4.8x10 <sup>-04</sup> | 2             | †rs11045856, †rs12367888             |
| <b>611.3813 2.97</b> | -0.05                | 7.5x10 <sup>-04</sup> | 3             | †rs11045856, †rs12367888, rs78338680 |
| <b>611.3809 3.18</b> | -0.05                | 1.0x10 <sup>-03</sup> | 3             | †rs11045856, †rs12367888, rs78338680 |
| <b>457.2808 3.57</b> | -0.12                | 3.4x10 <sup>-03</sup> | 2             | †rs11045856, †rs12367888             |
| <b>508.3080 2.64</b> | -0.06                | 1.4x10 <sup>-02</sup> | 1             | rs4997684                            |
| <b>323.2234 4.08</b> | -0.06                | 2.1x10 <sup>-02</sup> | 1             | †rs12367888                          |
| <b>236.6398 2.65</b> | -0.07                | 2.2x10 <sup>-02</sup> | 1             | †rs12367888                          |
| <b>474.2872 2.65</b> | -0.07                | 2.2x10 <sup>-02</sup> | 1             | †rs12367888                          |
| <b>320.1953 3.61</b> | -0.07                | 2.3x10 <sup>-02</sup> | 1             | †rs12367888                          |
| <b>314.1013 2.00</b> | -0.08                | 3.0x10 <sup>-02</sup> | 1             | rs16918645                           |
| <b>582.2710 4.66</b> | 0.06                 | 5.4x10 <sup>-02</sup> | 1             | †rs174592                            |
| <b>318.1743 2.10</b> | -0.09                | 6.5x10 <sup>-02</sup> | 1             | rs2035742                            |
| <b>577.3763 4.53</b> | -0.04                | 7.3x10 <sup>-02</sup> | 1             | rs2277119                            |
| <b>285.1711 2.66</b> | -0.03                | 1.2x10 <sup>-01</sup> | 2             | †rs5751777, rs79966373               |
| <b>497.2762 2.12</b> | -0.02                | 1.4x10 <sup>-01</sup> | 2             | †rs10238028, †rs28468623             |
| <b>429.2088 1.56</b> | 0.02                 | 1.5x10 <sup>-01</sup> | 3             | †rs10238028, †rs28468623, rs6705251  |
| <b>411.1939 1.98</b> | 0.04                 | 1.7x10 <sup>-01</sup> | 1             | †rs6889699                           |
| <b>598.3736 3.26</b> | 0.04                 | 1.9x10 <sup>-01</sup> | 1             | rs111906477                          |
| <b>598.3744 3.19</b> | 0.04                 | 1.9x10 <sup>-01</sup> | 1             | rs111906477                          |
| <b>594.3488 2.48</b> | 0.04                 | 1.9x10 <sup>-01</sup> | 1             | rs111906477                          |
| <b>594.3428 2.42</b> | 0.05                 | 1.9x10 <sup>-01</sup> | 1             | rs111906477                          |
| <b>537.3295 2.01</b> | -0.03                | 2.2x10 <sup>-01</sup> | 1             | †rs34367065                          |

|                      |       |                       |   |                          |
|----------------------|-------|-----------------------|---|--------------------------|
| <b>503.3233 3.35</b> | -0.04 | $2.2 \times 10^{-01}$ | 1 | †rs34367065              |
| <b>283.1531 2.77</b> | 0.03  | $3.3 \times 10^{-01}$ | 1 | †rs9943251               |
| <b>431.3170 4.61</b> | -0.01 | $4.8 \times 10^{-01}$ | 1 | †rs4663971               |
| <b>307.1199 2.04</b> | -0.01 | $5.5 \times 10^{-01}$ | 1 | †rs58231493              |
| <b>611.3527 2.01</b> | 0.01  | $6.5 \times 10^{-01}$ | 1 | †rs10006452              |
| <b>228.1600 2.53</b> | -0.01 | $7.0 \times 10^{-01}$ | 1 | †rs11211408              |
| <b>245.0863 2.79</b> | 0.00  | $9.8 \times 10^{-01}$ | 2 | rs187758672, †rs58231493 |

**N of variants:** number of variants associated with each BAL; †pleiotropic instruments according to Table S4. \*

Unadjusted P-value. BAL – Bioactive lipid; m/z – mass to charge ratio; rt – retention time.

Mendelian randomization performed with the R package “MendelianRandomization” (available at <https://CRAN.R-project.org/package=MendelianRandomization>).

**Table S5.** Pleiotropy table for previously known trait associations with index SNPs reported in the GWAS catalog <sup>1</sup>

| <b>Index SNP</b>  | <b>Phenotype</b>                                                                         | <b>Possible other SNPs</b> | <b>P-value</b>         | <b>PMID</b> |
|-------------------|------------------------------------------------------------------------------------------|----------------------------|------------------------|-------------|
| <b>rs10006452</b> | Estradiol levels                                                                         | rs7662029                  | 4.00x10 <sup>-18</sup> | 34255042    |
| <b>rs10006452</b> | Gamma glutamyl transferase levels                                                        | rs4588522                  | 5.00x10 <sup>-09</sup> | 33339817    |
| <b>rs10006452</b> | Liver enzyme levels (alkaline phosphatase)                                               | rs11931182                 | 3.00x10 <sup>-12</sup> | 33972514    |
| <b>rs10006452</b> | Serum 25-Hydroxyvitamin D levels                                                         | rs6422323                  | 5.00x10 <sup>-51</sup> | 32242144    |
| <b>rs10006452</b> | Systolic blood pressure                                                                  | rs6422324                  | 1.00x10 <sup>-08</sup> | 30595370    |
| <b>rs10006452</b> | Total testosterone levels                                                                | rs4632729                  | 2.00x10 <sup>-30</sup> | 32042192    |
| <b>rs10006452</b> | Urinary metabolite levels in chronic kidney disease                                      | rs7666195                  | 2.00x10 <sup>-14</sup> | 31959995    |
| <b>rs10238028</b> | Lymphocyte counts                                                                        | rs6465750                  | 5.00x10 <sup>-23</sup> | 32888494    |
| <b>rs10238028</b> | Metabolite levels                                                                        | rs10242455                 | 1.00x10 <sup>-45</sup> | 23093944    |
| <b>rs10238028</b> | Sex hormone-binding globulin levels                                                      | rs10238028                 | 1.00x10 <sup>-11</sup> | 32042192    |
| <b>rs10238028</b> | Tacrolimus trough concentration in kidney transplant patients                            | rs776746                   | 4.00x10 <sup>-97</sup> | 30801552    |
| <b>rs10238028</b> | Urinary metabolite modules (eigenmetabolites) in chronic kidney disease                  | rs776746                   | 3.00x10 <sup>-18</sup> | 31959995    |
| <b>rs11045856</b> | Serum metabolite levels                                                                  | rs11045856                 | 6.00x10 <sup>-40</sup> | 33031748    |
| <b>rs11211408</b> | Metabolite levels                                                                        | rs6678639                  | 8.00x10 <sup>-86</sup> | 24816252    |
| <b>rs11211408</b> | Serum metabolite concentrations in chronic kidney disease                                | rs4507958                  | 4.00x10 <sup>-14</sup> | 33838163    |
| <b>rs11211408</b> | Metabolic traits                                                                         | rs9332998                  | 5.00x10 <sup>-32</sup> | 21886157    |
| <b>rs12367888</b> | AR-C124910XX levels in individuals with acute coronary syndromes treated with ticagrelor | rs113681054                | 4.00x10 <sup>-13</sup> | 25935875    |



|                   |                                                                                                   |             |                        |          |
|-------------------|---------------------------------------------------------------------------------------------------|-------------|------------------------|----------|
| <b>rs12367888</b> | Bilirubin levels                                                                                  | rs4149056   | $7.00 \times 10^{-13}$ | 19414484 |
| <b>rs12367888</b> | Bioavailable testosterone levels                                                                  | rs4149056   | $3.00 \times 10^{-35}$ | 32042192 |
| <b>rs12367888</b> | Clinical laboratory measurements                                                                  | rs4149081   | $4.00 \times 10^{-22}$ | 27897004 |
| <b>rs12367888</b> | Cystatin C levels                                                                                 | rs4149081   | $1.00 \times 10^{-12}$ | 33462484 |
| <b>rs12367888</b> | Direct bilirubin levels                                                                           | rs4149081   | $0.00 \times 10^{+00}$ | 33462484 |
| <b>rs12367888</b> | Fasting plasma glycochenodeoxycholate 3-O-glucuronide concentration                               | rs4149056   | $3.00 \times 10^{-30}$ | 32961594 |
| <b>rs12367888</b> | Free thyroxine concentration                                                                      | rs4149056   | $6.00 \times 10^{-11}$ | 30367059 |
| <b>rs12367888</b> | Heel bone mineral density                                                                         | rs4149056   | $4.00 \times 10^{-12}$ | 30595370 |
| <b>rs12367888</b> | Low density lipoprotein cholesterol levels (on statin treatment)                                  | rs58310495  | $2.00 \times 10^{-11}$ | 31969989 |
| <b>rs12367888</b> | Low testosterone levels                                                                           | rs4149056   | $7.00 \times 10^{-16}$ | 34337532 |
| <b>rs12367888</b> | Lysophosphatidylethanolamine levels                                                               | rs1871395   | $4.00 \times 10^{-06}$ | 31551469 |
| <b>rs12367888</b> | Mean corpuscular hemoglobin                                                                       | rs4149056   | $9.00 \times 10^{-25}$ | 32888493 |
| <b>rs12367888</b> | Mean corpuscular volume                                                                           | rs4149056   | $6.00 \times 10^{-25}$ | 32888493 |
| <b>rs12367888</b> | Mean spheric corpuscular volume                                                                   | rs4149056   | $1.00 \times 10^{-23}$ | 32888494 |
| <b>rs12367888</b> | Metabolic traits                                                                                  | rs4149081   | $3.00 \times 10^{-22}$ | 21886157 |
| <b>rs12367888</b> | Metabolite levels                                                                                 | rs4149056   | $6.0 \times 10^{-315}$ | 24816252 |
| <b>rs12367888</b> | Methotrexate clearance (acute lymphoblastic leukemia)                                             | rs4149080   | $6.00 \times 10^{-21}$ | 23233662 |
| <b>rs12367888</b> | Monocyte count                                                                                    | rs113681054 | $3.00 \times 10^{-10}$ | 32888493 |
| <b>rs12367888</b> | Monocyte percentage of white cells                                                                | rs11045886  | $4.00 \times 10^{-10}$ | 32888494 |
| <b>rs12367888</b> | Neutrophil percentage of white cells                                                              | rs12317268  | $4.00 \times 10^{-11}$ | 32888494 |
| <b>rs12367888</b> | Plasma estrone conjugates levels in resected early stage estrogen-receptor positive breast cancer | rs4149056   | $4.00 \times 10^{-11}$ | 28429243 |

|                   |                                                                                                                                                                                                           |            |                         |          |
|-------------------|-----------------------------------------------------------------------------------------------------------------------------------------------------------------------------------------------------------|------------|-------------------------|----------|
| <b>rs12367888</b> | Response to statins (LDL cholesterol percent change)                                                                                                                                                      | rs58310495 | $7.00 \times 10^{-12}$  | 31969989 |
| <b>rs12367888</b> | Reticulocyte fraction of red cells                                                                                                                                                                        | rs4149067  | $5.00 \times 10^{-10}$  | 32888494 |
| <b>rs12367888</b> | Serum uric acid levels                                                                                                                                                                                    | rs4149056  | $9.00 \times 10^{-10}$  | 34594039 |
| <b>rs12367888</b> | Sex hormone-binding globulin levels                                                                                                                                                                       | rs57743625 | $3.00 \times 10^{-117}$ | 32042192 |
| <b>rs12367888</b> | Statin-induced myopathy (severe)                                                                                                                                                                          | rs4149056  | $3.00 \times 10^{-09}$  | 31220337 |
| <b>rs12367888</b> | Total bilirubin levels                                                                                                                                                                                    | rs4149081  | $0.01 \times 10^{-20}$  | 33462484 |
| <b>rs12367888</b> | Total testosterone levels                                                                                                                                                                                 | rs73079476 | $4.00 \times 10^{-40}$  | 32042192 |
| <b>rs12367888</b> | Triglyceride levels                                                                                                                                                                                       | rs4149081  | $2.00 \times 10^{-20}$  | 33462484 |
| <b>rs12367888</b> | Urate levels                                                                                                                                                                                              | rs4149056  | $2.00 \times 10^{-08}$  | 31578528 |
| <b>rs12367888</b> | Urinary metabolite levels in chronic kidney disease                                                                                                                                                       | rs4149056  | $4.00 \times 10^{-32}$  | 31959995 |
| <b>rs12367888</b> | Urinary metabolite modules (eigenmetabolites) in chronic kidney disease                                                                                                                                   | rs55695203 | $4.00 \times 10^{-22}$  | 31959995 |
| <b>rs12367888</b> | Vitamin D levels                                                                                                                                                                                          | rs12317268 | $2.00 \times 10^{-14}$  | 32242144 |
| <b>rs174592</b>   | Age-related disease                                                                                                                                                                                       | rs174547   | $1.00 \times 10^{-29}$  | 27790247 |
| <b>rs174592</b>   | Alanine aminotransferase levels                                                                                                                                                                           | rs174576   | $1.00 \times 10^{-09}$  | 33339817 |
| <b>rs174592</b>   | Anorexia nervosa, attention-deficit/hyperactivity disorder, autism spectrum disorder, bipolar disorder, major depression, obsessive-compulsive disorder, schizophrenia, or Tourette syndrome (pleiotropy) | rs174592   | $6.00 \times 10^{-09}$  | 31835028 |
| <b>rs174592</b>   | Aortic valve stenosis                                                                                                                                                                                     | rs174547   | $3.00 \times 10^{-08}$  | 32186652 |
| <b>rs174592</b>   | Apolipoprotein A1 levels                                                                                                                                                                                  | rs174566   | $9.00 \times 10^{-65}$  | 32203549 |
| <b>rs174592</b>   | Apolipoprotein B levels                                                                                                                                                                                   | rs174564   | $6.00 \times 10^{-95}$  | 32203549 |
| <b>rs174592</b>   | Aspartate aminotransferase platelet ratio index in high alcohol intake                                                                                                                                    | rs174566   | $2.00 \times 10^{-08}$  | 32561361 |

|                 |                                                                                                                                                     |          |                        |          |
|-----------------|-----------------------------------------------------------------------------------------------------------------------------------------------------|----------|------------------------|----------|
| <b>rs174592</b> | Asthma                                                                                                                                              | rs174584 | 2.00x10 <sup>-20</sup> | 31669095 |
| <b>rs174592</b> | Balding type 1                                                                                                                                      | rs1535   | 1.00x10 <sup>-14</sup> | 30595370 |
| <b>rs174592</b> | Bipolar disorder                                                                                                                                    | rs174592 | 1.00x10 <sup>-13</sup> | 34002096 |
| <b>rs174592</b> | C-reactive protein levels or HDL-cholesterol levels (pleiotropy)                                                                                    | rs174546 | 2.00x10 <sup>-24</sup> | 27286809 |
| <b>rs174592</b> | C-reactive protein levels or LDL-cholesterol levels (pleiotropy)                                                                                    | rs174574 | 8.00x10 <sup>-10</sup> | 27286809 |
| <b>rs174592</b> | C-reactive protein levels or triglyceride levels (pleiotropy)                                                                                       | rs174546 | 5.00x10 <sup>-27</sup> | 27286809 |
| <b>rs174592</b> | Cholelithiasis                                                                                                                                      | rs174567 | 1.00x10 <sup>-11</sup> | 34594039 |
| <b>rs174592</b> | Cholesterol, total                                                                                                                                  | rs174546 | 3.00x10 <sup>-37</sup> | 24097068 |
| <b>rs174592</b> | Chronic inflammatory diseases (ankylosing spondylitis, Crohn's disease, psoriasis, primary sclerosing cholangitis, ulcerative colitis) (pleiotropy) | rs174535 | 2.00x10 <sup>-11</sup> | 26974007 |
| <b>rs174592</b> | Colorectal cancer                                                                                                                                   | rs174537 | 9.00x10 <sup>-21</sup> | 24836286 |
| <b>rs174592</b> | Comprehensive strength and appendicular lean mass                                                                                                   | rs174547 | 2.00x10 <sup>-07</sup> | 22960237 |
| <b>rs174592</b> | Crohn's disease                                                                                                                                     | rs174537 | 2.00x10 <sup>-12</sup> | 26192919 |
| <b>rs174592</b> | Delta-5 desaturase activity response to n3-polyunsaturated fat supplement                                                                           | rs174566 | 1.00x10 <sup>-12</sup> | 29246731 |
| <b>rs174592</b> | Delta-6 desaturase activity                                                                                                                         | rs174545 | 5.00x10 <sup>-37</sup> | 26584805 |
| <b>rs174592</b> | Electrocardiographic traits (multivariate)                                                                                                          | rs174537 | 1.00x10 <sup>-11</sup> | 32602732 |
| <b>rs174592</b> | Eosinophil counts                                                                                                                                   | rs174583 | 4.00x10 <sup>-26</sup> | 32888493 |
| <b>rs174592</b> | Fasting glucose                                                                                                                                     | rs174583 | 3.00x10 <sup>-22</sup> | 34059833 |
| <b>rs174592</b> | Gallstone disease                                                                                                                                   | rs174567 | 2.00x10 <sup>-12</sup> | 30504769 |
| <b>rs174592</b> | Glycemic traits (pleiotropy)                                                                                                                        | rs174535 | 2.00x10 <sup>-08</sup> | 31021400 |

|                 |                                                      |          |                         |          |
|-----------------|------------------------------------------------------|----------|-------------------------|----------|
| <b>rs174592</b> | Glycerophospholipid levels                           | rs174547 | $2.00 \times 10^{-175}$ | 26068415 |
| <b>rs174592</b> | Gondoic acid (20:1n-9) levels                        | rs174528 | $3.00 \times 10^{-46}$  | 28298293 |
| <b>rs174592</b> | HDL cholesterol levels                               | rs174566 | $1.00 \times 10^{-174}$ | 32203549 |
| <b>rs174592</b> | Heel bone mineral density                            | rs174574 | $3.00 \times 10^{-17}$  | 30048462 |
| <b>rs174592</b> | Height                                               | rs174547 | $6.00 \times 10^{-18}$  | 25429064 |
| <b>rs174592</b> | Hematocrit                                           | rs174578 | $1.00 \times 10^{-42}$  | 32888493 |
| <b>rs174592</b> | Hemoglobin concentration                             | rs174528 | $3.00 \times 10^{-61}$  | 32888493 |
| <b>rs174592</b> | High light scatter reticulocyte count                | rs102275 | $3.00 \times 10^{-11}$  | 32888494 |
| <b>rs174592</b> | Homeostasis model assessment of beta-cell function   | rs174550 | $5.00 \times 10^{-13}$  | 20081858 |
| <b>rs174592</b> | Hypothyroidism                                       | rs174599 | $4.00 \times 10^{-11}$  | 30595370 |
| <b>rs174592</b> | Inflammatory bowel disease                           | rs1535   | $3.00 \times 10^{-09}$  | 26192919 |
| <b>rs174592</b> | Iron status biomarkers (total iron binding capacity) | rs174546 | $7.00 \times 10^{-22}$  | 33536631 |
| <b>rs174592</b> | Irritable mood                                       | rs102275 | $1.00 \times 10^{-08}$  | 29500382 |
| <b>rs174592</b> | LDL cholesterol levels                               | rs174564 | $3.00 \times 10^{-48}$  | 32203549 |
| <b>rs174592</b> | Lipid metabolism phenotypes                          | rs174547 | $8.00 \times 10^{-262}$ | 22286219 |
| <b>rs174592</b> | Liver enzyme levels (alkaline phosphatase)           | rs174564 | $3.00 \times 10^{-130}$ | 33972514 |
| <b>rs174592</b> | Lysophosphatidylethanolamine levels                  | rs174584 | $3.00 \times 10^{-15}$  | 31551469 |
| <b>rs174592</b> | Major depressive disorder                            | rs102275 | $3.00 \times 10^{-17}$  | 34045744 |
| <b>rs174592</b> | Male-pattern baldness                                | rs174592 | $7.00 \times 10^{-22}$  | 30573740 |
| <b>rs174592</b> | Mean corpuscular volume                              | rs174564 | $2.00 \times 10^{-34}$  | 32888493 |
| <b>rs174592</b> | Metabolic syndrome                                   | rs1535   | $3.00 \times 10^{-31}$  | 31589552 |
| <b>rs174592</b> | Metabolite levels                                    | rs102275 | $4.00 \times 10^{-264}$ | 22916037 |
| <b>rs174592</b> | Nasal polyps                                         | rs174535 | $4.00 \times 10^{-09}$  | 30643255 |
| <b>rs174592</b> | Oleic acid (18:1n-9) levels                          | rs102275 | $1.00 \times 10^{-39}$  | 28298293 |
| <b>rs174592</b> | Osteoporosis-related phenotypes (MTAG)               | rs174547 | $5.00 \times 10^{-07}$  | 32107650 |

|                 |                                                                                 |          |                         |          |
|-----------------|---------------------------------------------------------------------------------|----------|-------------------------|----------|
| <b>rs174592</b> | P wave duration                                                                 | rs174577 | 3.00x10 <sup>-08</sup>  | 24850809 |
| <b>rs174592</b> | Palmitoleic acid (16:1n-7) levels                                               | rs102275 | 2.00x10 <sup>-16</sup>  | 28298293 |
| <b>rs174592</b> | Phosphatidylcholine levels                                                      | rs1535   | 2.00x10 <sup>-43</sup>  | 31551469 |
| <b>rs174592</b> | Plasma omega-6 polyunsaturated fatty acid levels (arachidonic acid)             | rs174547 | 0.00x10 <sup>+00</sup>  | 24823311 |
| <b>rs174592</b> | Platelet count                                                                  | rs174546 | 9.00x10 <sup>-20</sup>  | 34594039 |
| <b>rs174592</b> | Pulse pressure                                                                  | rs174564 | 6.00x10 <sup>-10</sup>  | 30578418 |
| <b>rs174592</b> | QRS duration                                                                    | rs174577 | 4.00x10 <sup>-11</sup>  | 27659466 |
| <b>rs174592</b> | Red blood cell fatty acid levels                                                | rs174601 | 3.00x10 <sup>-305</sup> | 25500335 |
| <b>rs174592</b> | Respiratory diseases                                                            | rs174535 | 3.00x10 <sup>-13</sup>  | 30595370 |
| <b>rs174592</b> | Response to statin therapy                                                      | rs1535   | 7.00x10 <sup>-06</sup>  | 20339536 |
| <b>rs174592</b> | Resting heart rate                                                              | rs174536 | 2.00x10 <sup>-30</sup>  | 27798624 |
| <b>rs174592</b> | Serum alkaline phosphatase levels                                               | rs174567 | 2.00x10 <sup>-88</sup>  | 34594039 |
| <b>rs174592</b> | Serum docosahexaenoic fatty acid concentration in metabolic syndrome            | rs174547 | 6.00x10 <sup>-12</sup>  | 31991592 |
| <b>rs174592</b> | Serum metabolite ratios in chronic kidney disease                               | rs102275 | 2.00x10 <sup>-82</sup>  | 29545352 |
| <b>rs174592</b> | Serum omega-6 to omega-3 polyunsaturated fatty acid ratio in metabolic syndrome | rs174547 | 4.00x10 <sup>-15</sup>  | 31991592 |
| <b>rs174592</b> | Serum total protein level                                                       | rs174577 | 1.00x10 <sup>-12</sup>  | 34594039 |
| <b>rs174592</b> | Sex hormone-binding globulin levels adjusted for BMI                            | rs174533 | 1.00x10 <sup>-28</sup>  | 32042192 |
| <b>rs174592</b> | Spherical equivalent                                                            | rs174535 | 3.00x10 <sup>-10</sup>  | 32352494 |
| <b>rs174592</b> | Sphingolipid levels                                                             | rs174547 | 5.00x10 <sup>-12</sup>  | 26068415 |
| <b>rs174592</b> | Stearic acid (18:0) levels                                                      | rs102275 | 1.00x10 <sup>-20</sup>  | 23362303 |
| <b>rs174592</b> | Stem cell factor levels                                                         | rs174528 | 9.00x10 <sup>-16</sup>  | 33067605 |
| <b>rs174592</b> | Total bilirubin levels                                                          | rs174574 | 8.00x10 <sup>-20</sup>  | 34594039 |

|                   |                                                             |            |                         |          |
|-------------------|-------------------------------------------------------------|------------|-------------------------|----------|
| <b>rs174592</b>   | Total cholesterol levels                                    | rs174545   | 5.00x10 <sup>-81</sup>  | 34594039 |
| <b>rs174592</b>   | Trans fatty acid levels                                     | rs174574   | 3.00x10 <sup>-14</sup>  | 25646338 |
| <b>rs174592</b>   | Triglyceride levels                                         | rs174566   | 2.00x10 <sup>-120</sup> | 32203549 |
| <b>rs174592</b>   | Urate levels                                                | rs174594   | 5.00x10 <sup>-08</sup>  | 31578528 |
| <b>rs174592</b>   | Vaccenic acid (18:1n-7) levels                              | rs174528   | 7.00x10 <sup>-10</sup>  | 28298293 |
| <b>rs174592</b>   | Vitamin C levels                                            | rs174547   | 4.00x10 <sup>-08</sup>  | 33203707 |
| <b>rs28468623</b> | Glycated hemoglobin levels                                  | rs2301889  | 8.00x10 <sup>-06</sup>  | 34059833 |
| <b>rs28468623</b> | Red cell distribution width                                 | rs2301889  | 3.00x10 <sup>-09</sup>  | 30595370 |
| <b>rs28468623</b> | Metabolite levels                                           | rs17161692 | 6.00x10 <sup>-32</sup>  | 23093944 |
| <b>rs28468623</b> | Lymphocyte counts                                           | rs73395580 | 2.00x10 <sup>-22</sup>  | 32888493 |
| <b>rs28468623</b> | Neutrophil percentage of white cells                        | rs3779354  | 2.00x10 <sup>-15</sup>  | 32888494 |
| <b>rs34367065</b> | Acenocoumarol maintenance dosage                            | rs12772169 | 8.00x10 <sup>-12</sup>  | 19578179 |
| <b>rs34367065</b> | Warfarin maintenance dose (adjusted for clinical factors)   | rs12772169 | 8.00x10 <sup>-10</sup>  | 28686080 |
| <b>rs34367065</b> | Serum alkaline phosphatase levels                           | rs34870400 | 2.00x10 <sup>-10</sup>  | 33547301 |
| <b>rs34367065</b> | Clopidogrel active metabolite levels                        | rs7915414  | 3.00x10 <sup>-14</sup>  | 28207573 |
| <b>rs4663971</b>  | L1-L4 bone mineral density x serum urate levels interaction | rs4663971  | 9.00x10 <sup>-06</sup>  | 34046847 |
| <b>rs4663971</b>  | Bilirubin levels in tenofovir-treated HIV infection         | rs10929301 | 7.00x10 <sup>-09</sup>  | 26148204 |
| <b>rs4663971</b>  | Total bilirubin levels in HIV-1 infection                   | rs3755319  | 9.00x10 <sup>-20</sup>  | 25884002 |
| <b>rs5751777</b>  | Alanine aminotransferase levels                             | rs5751775  | 1.00x10 <sup>-10</sup>  | 34594039 |
| <b>rs5751777</b>  | Blood protein levels                                        | rs5760120  | 8.00x10 <sup>-26</sup>  | 30072576 |
| <b>rs5751777</b>  | Liver enzyme levels (alkaline phosphatase)                  | rs5751777  | 1.00x10 <sup>-22</sup>  | 33972514 |
| <b>rs5751777</b>  | Macrophage Migration Inhibitory Factor levels               | rs2330634  | 5.00x10 <sup>-10</sup>  | 27989323 |
| <b>rs5751777</b>  | Neutrophil count                                            | rs1985951  | 1.00x10 <sup>-10</sup>  | 32888493 |

|                        |                                                     |             |                         |          |
|------------------------|-----------------------------------------------------|-------------|-------------------------|----------|
| <b>rs5751777</b>       | Protein quantitative trait loci (liver)             | rs4822455   | $3.00 \times 10^{-71}$  | 32778093 |
| <b>rs5751777</b>       | Serum alkaline phosphatase levels                   | rs5751775   | $8.00 \times 10^{-17}$  | 33547301 |
| <b>rs5751777</b>       | Triglyceride levels                                 | rs140288    | $4.00 \times 10^{-11}$  | 32203549 |
| <b>rs58231493</b>      | Urinary metabolite levels in chronic kidney disease | rs11626972  | $3.00 \times 10^{-145}$ | 31959995 |
| <b>rs6889699</b>       | Metabolite levels                                   | rs113590482 | $5.00 \times 10^{-23}$  | 33031748 |
| <b>rs9943251</b>       | Metabolite levels                                   | rs6693388   | $4.00 \times 10^{-38}$  | 24816252 |
| <b>rs9943251</b>       | Acylcarnitine levels                                | rs10494270  | $5.00 \times 10^{-13}$  | 26068415 |
| <b>rs9943251</b>       | Metabolite concentrations in chronic kidney disease | rs6657658   | $1.00 \times 10^{-12}$  | 29545352 |
| <b>PMID:</b> PubMed ID |                                                     |             |                         |          |

**Table S6.** Pathway analysis for index SNPs from SNP-nexus<sup>2</sup>

| Index SNP          | Genes Involved    | Description                         | Parent(s)  | P-value |
|--------------------|-------------------|-------------------------------------|------------|---------|
| <b>rs10006452,</b> | CYP39A1, CYP2C18, |                                     |            |         |
| <b>rs11045856,</b> | CYP2C19, UGT2B7,  |                                     |            |         |
| <b>rs12367888,</b> | FADS2, SLCO1B1,   |                                     |            |         |
| <b>rs174592,</b>   | UGT3A1, CYP4V2,   |                                     |            |         |
| <b>rs2277119,</b>  | UGT1A8, UGT1A10,  | Metabolism                          | Metabolism | <0.001  |
| <b>rs34367065,</b> | UGT1A9, UGT1A7,   |                                     |            |         |
| <b>rs4663971,</b>  | UGT1A6, UGT1A5,   |                                     |            |         |
| <b>rs4997684,</b>  | UGT1A4, UGT1A3,   |                                     |            |         |
| <b>rs6889699</b>   | UGT1A1            |                                     |            |         |
| <b>rs10006452,</b> | CYP39A1, CYP2C18, |                                     |            |         |
| <b>rs10006452,</b> | CYP2C19, UGT2B7,  |                                     |            |         |
| <b>rs2277119,</b>  | UGT3A1, CYP4V2,   |                                     |            |         |
| <b>rs34367065,</b> | UGT1A8, UGT1A10,  | Biological oxidations               | Metabolism | <0.001  |
| <b>rs4663971,</b>  | UGT1A9, UGT1A7,   |                                     |            |         |
| <b>rs4997684,</b>  | UGT1A6, UGT1A5,   |                                     |            |         |
| <b>rs6889699</b>   | UGT1A4, UGT1A3,   |                                     |            |         |
|                    | UGT1A1            |                                     |            |         |
| <b>rs10006452,</b> | UGT2B7, UGT3A1,   |                                     |            |         |
| <b>rs10006452,</b> | UGT1A8, UGT1A10,  |                                     |            |         |
| <b>rs4663971,</b>  | UGT1A9, UGT1A7,   | Phase II - Conjugation of compounds | Metabolism | <0.001  |
| <b>rs6889699</b>   | UGT1A6, UGT1A5,   |                                     |            |         |
|                    | UGT1A4, UGT1A3,   |                                     |            |         |
|                    | UGT1A1            |                                     |            |         |
| <b>rs10006452,</b> | UGT2B7, UGT3A1,   |                                     |            |         |
| <b>rs4663971,</b>  | UGT1A8, UGT1A10,  | Glucuronidation                     | Metabolism | <0.001  |
| <b>rs6889699</b>   | UGT1A9, UGT1A7,   |                                     |            |         |



|                                                                                                                             |                                                |                                                                       |                                 |        |
|-----------------------------------------------------------------------------------------------------------------------------|------------------------------------------------|-----------------------------------------------------------------------|---------------------------------|--------|
|                                                                                                                             | UGT1A6, UGT1A5,<br>UGT1A4, UGT1A3,<br>UGT1A1   |                                                                       |                                 |        |
| <b>rs11045856,</b><br><b>rs12367888</b>                                                                                     | SLCO1B1                                        | Defective SLCO1B1 causes<br>hyperbilirubinemia, Rotor type<br>(HBLRR) | Disease                         | 0.002  |
| <b>rs11045856,</b><br><b>rs12367888</b>                                                                                     | SLCO1B1                                        | Recycling of bile acids and salts                                     | Metabolism                      | 0.028  |
| <b>rs11045856,</b><br><b>rs12367888</b>                                                                                     | SLCO1B1                                        | Transport of organic anions                                           | Transport of small<br>molecules | 0.021  |
| <b>rs11045856,</b><br><b>rs12367888,</b><br><b>rs174592,</b><br><b>rs2277119,</b><br><b>rs34367065,</b><br><b>rs4663971</b> | CYP39A1, CYP2C19,<br>FADS2, SLCO1B1,<br>UGT1A9 | Metabolism of lipids                                                  | Metabolism                      | 0.008  |
| <b>rs11045856,</b><br><b>rs12367888,</b><br><b>rs2277119</b>                                                                | CYP39A1, SLCO1B1                               | Bile acid and bile salt metabolism                                    | Metabolism                      | 0.003  |
| <b>rs11045856,</b><br><b>rs12367888,</b><br><b>rs2277119</b>                                                                | CYP39A1, SLCO1B1                               | Metabolism of steroids                                                | Metabolism                      | 0.029  |
| <b>rs11045856,</b><br><b>rs12367888,</b><br><b>rs4663971</b>                                                                | SLCO1B1, UGT1A4                                | Heme degradation                                                      | Metabolism                      | <0.001 |

|                                                              |                                   |                                                                             |                     |        |
|--------------------------------------------------------------|-----------------------------------|-----------------------------------------------------------------------------|---------------------|--------|
| <b>rs11045856,</b><br><b>rs12367888,</b><br><b>rs4663971</b> | SLCO1B1, UGT1A4                   | Metabolism of porphyrins                                                    | Metabolism          | 0.001  |
| <b>rs174592</b>                                              | FADS2                             | alpha-linolenic (omega3) and linoleic (omega6) acid metabolism              | Metabolism          | 0.023  |
| <b>rs174592,</b><br><b>rs34367065</b>                        | CYP2C19, FADS2                    | Fatty acid metabolism                                                       | Metabolism          | 0.039  |
| <b>rs2035742</b>                                             | HHIP                              | GLI proteins bind promoters of Hh responsive genes to promote transcription | Signal Transduction | 0.012  |
| <b>rs2035742</b>                                             | HHIP                              | Ligand-receptor interactions                                                | Signal Transduction | 0.014  |
| <b>rs2277119</b>                                             | CYP39A1                           | Synthesis of bile acids and bile salts via 24-hydroxycholesterol            | Metabolism          | 0.025  |
| <b>rs2277119,</b><br><b>rs34367065,</b><br><b>rs4997684</b>  | CYP39A1, CYP2C18, CYP2C19, CYP4V2 | Cytochrome P450 - arranged by substrate type                                | Metabolism          | <0.001 |
| <b>rs2277119,</b><br><b>rs34367065,</b><br><b>rs4997684</b>  | CYP39A1, CYP2C18, CYP2C19, CYP4V2 | Phase I - Functionalization of compounds                                    | Metabolism          | <0.001 |
| <b>rs2277119,</b><br><b>rs4997684</b>                        | CYP39A1, CYP4V2                   | Endogenous sterols                                                          | Metabolism          | 0.001  |
| <b>rs34367065</b>                                            | CYP2C18, CYP2C19                  | Xenobiotics                                                                 | Metabolism          | 0.001  |
| <b>rs34367065</b>                                            | CYP2C19                           | Synthesis of epoxy (EET) and dihydroxyeicosatrienoic acids (DHET)           | Metabolism          | 0.014  |
| <b>rs34367065</b>                                            | CYP2C19                           | Synthesis of (16-20)-hydroxyeicosatetraenoic acids (HETE)                   | Metabolism          | 0.016  |

|                   |                |                                                                         |                        |       |
|-------------------|----------------|-------------------------------------------------------------------------|------------------------|-------|
| <b>rs34367065</b> | CYP2C19        | CYP2E1 reactions                                                        | Metabolism             | 0.02  |
| <b>rs4663971</b>  | UGT1A8         | Defective UGT1A1 causes hyperbilirubinemia                              | Disease                | 0.002 |
| <b>rs4663971</b>  | UGT1A4         | Defective UGT1A4 causes hyperbilirubinemia                              | Disease                | 0.002 |
| <b>rs4663971</b>  | UGT1A8, UGT1A4 | Metabolic disorders of biological oxidation enzymes                     | Disease                | 0.002 |
| <b>rs4663971</b>  | UGT1A3         | NR1H2 & NR1H3 regulate gene expression to control bile acid homeostasis | Signal<br>Transduction | 0.016 |
| <b>rs4997684</b>  | CYP4V2         | The canonical retinoid cycle in rods (twilight vision)                  | Signal<br>Transduction | 0.039 |

**Table S7.** Results from mediation analysis through BALs in the relationship between PA and CVD in VITAL-CVD sub-study with validation in JUPITER-CVD.

| <i>BAL m/z</i>  | <i>rt</i>   | <u>VITAL-CVD</u> |               |       |               |              |       | <u>JUPITER-CVD</u> |               |       |               |              |       |
|-----------------|-------------|------------------|---------------|-------|---------------|--------------|-------|--------------------|---------------|-------|---------------|--------------|-------|
|                 |             | Indirect Effect  |               |       | Direct effect |              |       | Indirect Effect    |               |       | Direct effect |              |       |
|                 |             | Estimate         | 95% CI        | P     | Estimate      | 95% CI       | P     | Estimate           | 95% CI        | P     | Estimate      | 95% CI       | P     |
| <b>341.2699</b> | <b>3.74</b> | -0.048           | -0.076,-0.019 | 0.001 | -0.016        | -0.13,0.098  | 0.786 | -0.009             | -0.022,0.004  | 0.155 | -0.058        | -0.135,0.018 | 0.135 |
| <b>599.3444</b> | <b>1.86</b> | -0.031           | -0.056,-0.006 | 0.013 | -0.031        | -0.144,0.083 | 0.595 | -0.005             | -0.014,0.003  | 0.245 | -0.063        | -0.139,0.013 | 0.103 |
| <b>613.3571</b> | <b>1.99</b> | -0.027           | -0.048,-0.005 | 0.014 | -0.03         | -0.143,0.084 | 0.61  | -0.016             | -0.031,-0.001 | 0.042 | -0.057        | -0.134,0.019 | 0.14  |
| <b>613.3599</b> | <b>2.06</b> | -0.028           | -0.05,-0.006  | 0.014 | -0.029        | -0.143,0.084 | 0.612 | -0.016             | -0.031,-0.001 | 0.042 | -0.057        | -0.134,0.019 | 0.14  |
| <b>611.3807</b> | <b>3.34</b> | -0.026           | -0.047,-0.004 | 0.019 | -0.034        | -0.147,0.079 | 0.557 | -0.004             | -0.012,0.004  | 0.311 | -0.066        | -0.142,0.01  | 0.09  |
| <b>611.3807</b> | <b>3.46</b> | -0.024           | -0.044,-0.003 | 0.021 | -0.038        | -0.151,0.075 | 0.514 | -0.003             | -0.011,0.004  | 0.367 | -0.067        | -0.143,0.009 | 0.084 |
| <b>625.3511</b> | <b>2.40</b> | -0.024           | -0.045,-0.004 | 0.022 | -0.035        | -0.148,0.079 | 0.549 | -0.011             | -0.024,0.002  | 0.111 | -0.064        | -0.14,0.013  | 0.102 |
| <b>479.3394</b> | <b>3.91</b> | -0.023           | -0.042,-0.003 | 0.022 | -0.031        | -0.145,0.083 | 0.592 | -0.01              | -0.022,0.002  | 0.111 | -0.061        | -0.137,0.015 | 0.118 |
| <b>257.1759</b> | <b>2.85</b> | -0.021           | -0.04,-0.002  | 0.031 | -0.039        | -0.152,0.074 | 0.496 | -0.001             | -0.005,0.003  | 0.643 | -0.067        | -0.143,0.009 | 0.084 |
| <b>543.2783</b> | <b>1.18</b> | -0.019           | -0.037,-0.001 | 0.036 | -0.036        | -0.15,0.077  | 0.53  | -0.003             | -0.01,0.004   | 0.346 | -0.064        | -0.14,0.012  | 0.099 |
| <b>307.2279</b> | <b>6.27</b> | -0.019           | -0.037,-0.001 | 0.036 | -0.04         | -0.153,0.072 | 0.482 | 0.001              | -0.003,0.006  | 0.599 | -0.065        | -0.141,0.011 | 0.092 |

|                      |        |               |       |        |              |       |        |              |       |        |              |       |
|----------------------|--------|---------------|-------|--------|--------------|-------|--------|--------------|-------|--------|--------------|-------|
| <b>251.1657 4.81</b> | -0.02  | -0.039,-0.001 | 0.037 | -0.037 | -0.15,0.077  | 0.525 | 0.001  | -0.003,0.005 | 0.644 | -0.068 | -0.144,0.008 | 0.077 |
| <b>343.2856 4.29</b> | -0.027 | -0.052,-0.001 | 0.039 | -0.036 | -0.15,0.078  | 0.537 | -0.003 | -0.009,0.004 | 0.386 | -0.064 | -0.14,0.012  | 0.098 |
| <b>497.3496 2.69</b> | -0.022 | -0.043,0      | 0.049 | -0.033 | -0.147,0.081 | 0.571 | -0.022 | -0.04,-0.004 | 0.016 | -0.048 | -0.125,0.029 | 0.219 |

---

Mediation analysis adjusted for age, sex, race/ethnicity, LDL-C, total-C, and smoking; BAL – Bioactive lipid; m/z – mass to charge ratio; rt – retention time.

---

**Fig. S1: Significant PA-BAL association counts identified by each model in both discovery and validation cohorts**

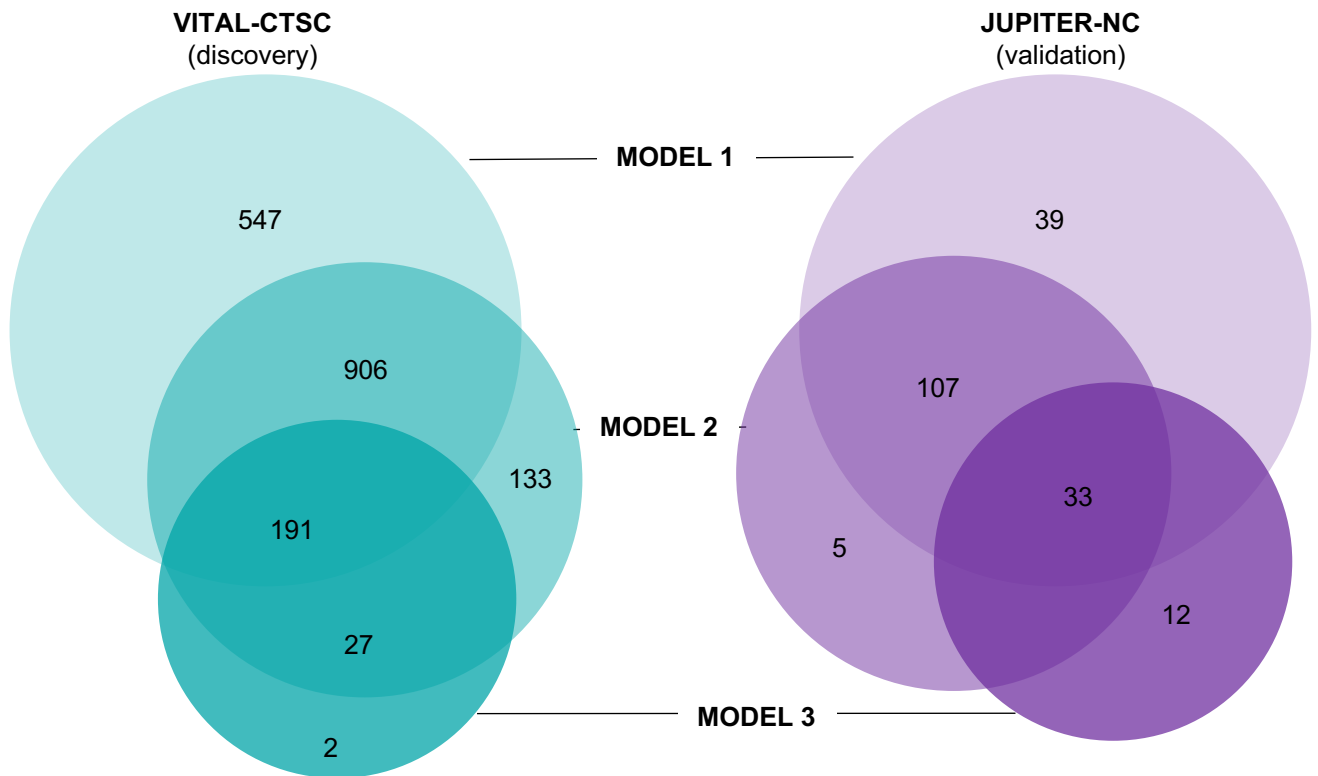

**Model 1** was adjusted for age and sex.

**Model 2** was adjusted for age, sex, race/ethnicity, LDL-cholesterol, total-cholesterol, and smoking.

**Model 3** was adjusted for same covariates as in model 2 plus categorized BMI (< 25, 25–29.9, or ≥ 30 kg/m<sup>2</sup>) and HDL-cholesterol.

**Fig. S2: Results from model 1, adjusted for age and sex**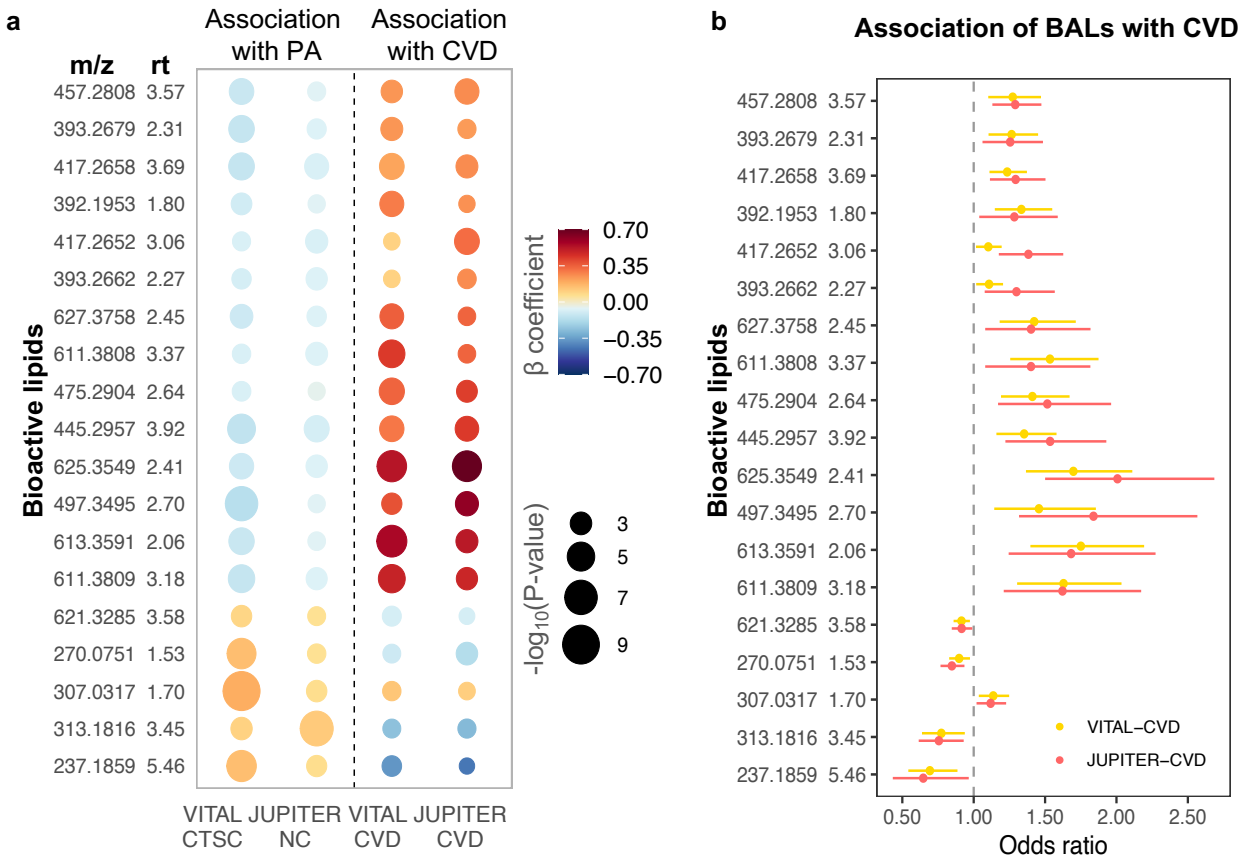

**a)** Rainplot representing  $\beta$  coefficients for the 19 BALs that associated with incident CVD (FDR < 0.1) and respective associations with PA. The dashed line separates PA-BAL (left side) from BAL-CVD (right side) associations. **b)** Odds ratio for the association of PA-significant BALs and incident CVD events. **Abbreviations:** m/z – mass to charge ratio; rt – retention time.

**Fig. S3: Manhattan plots showing index SNPs within independent loci associated with PA-related BALs**

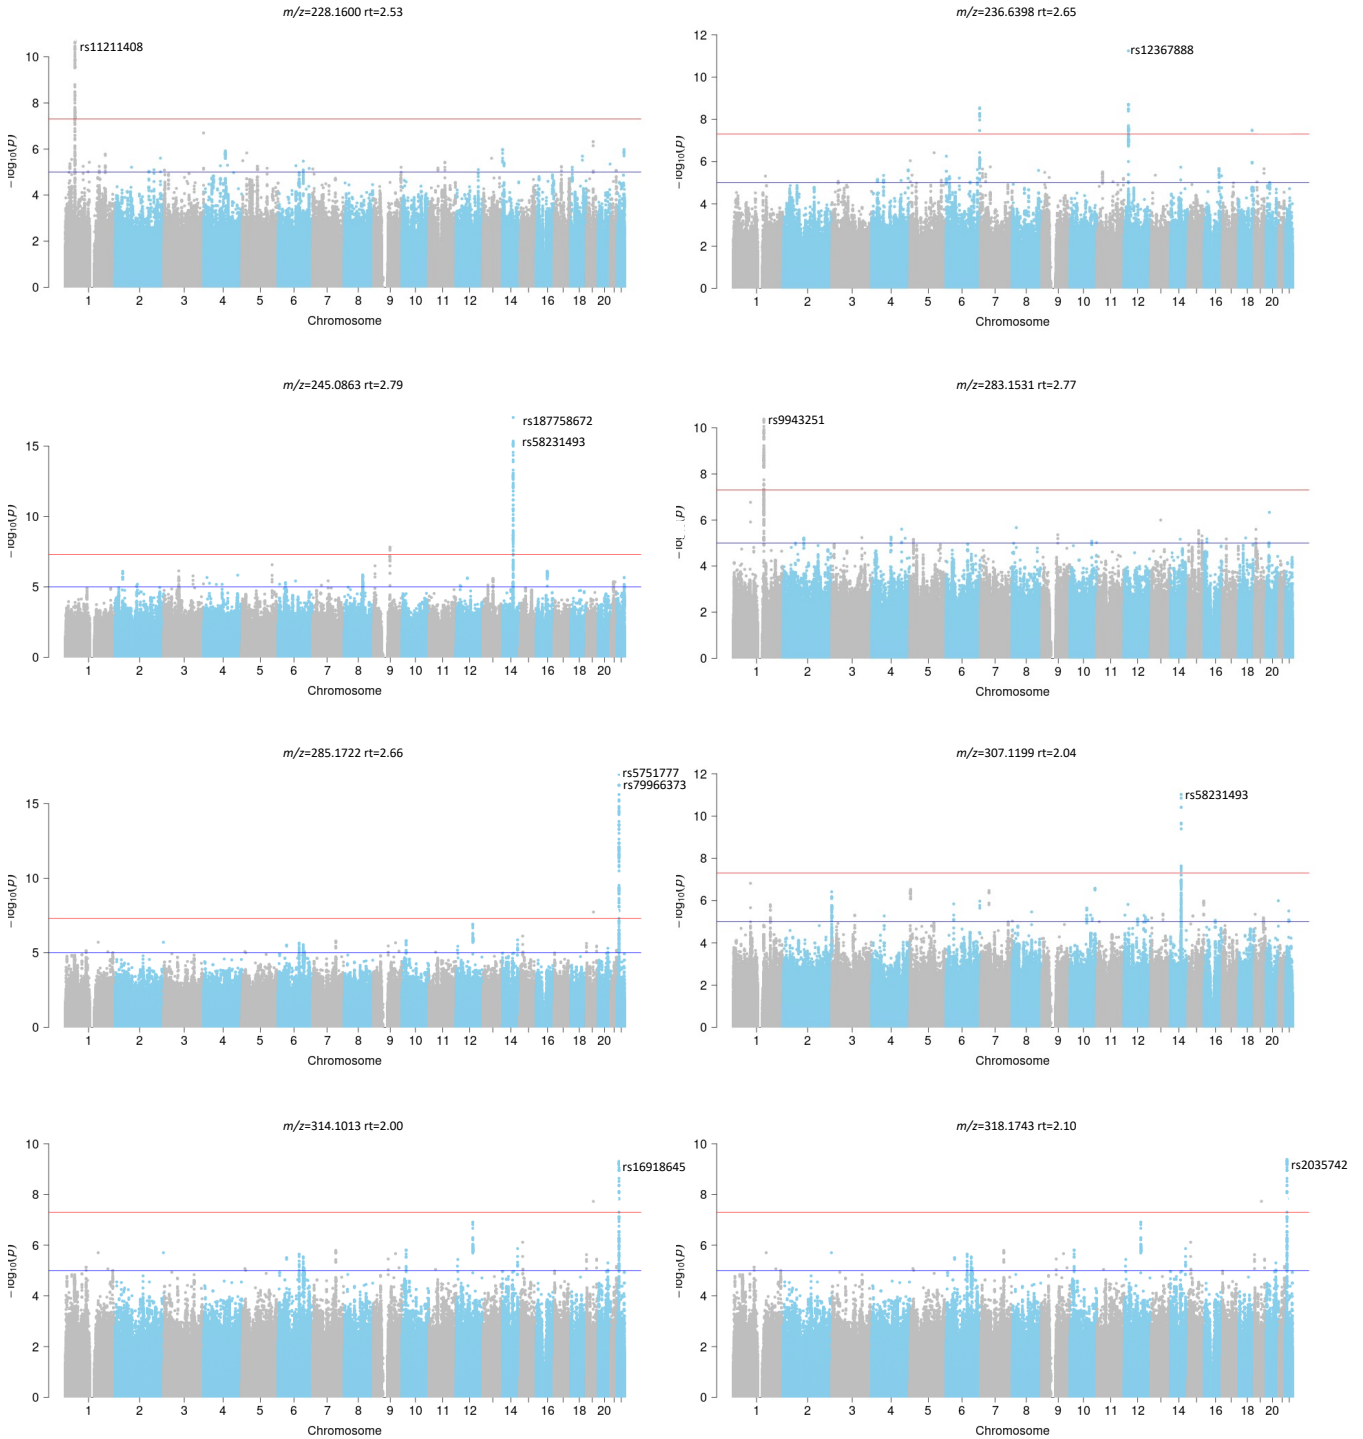



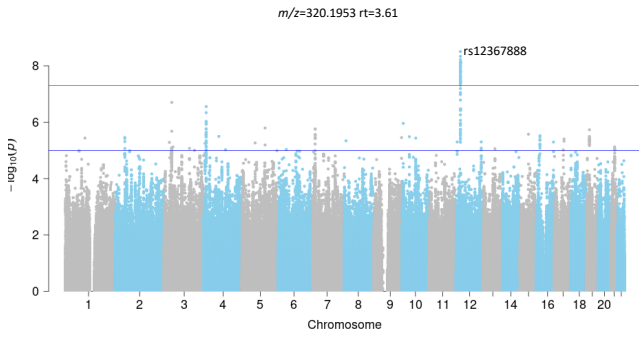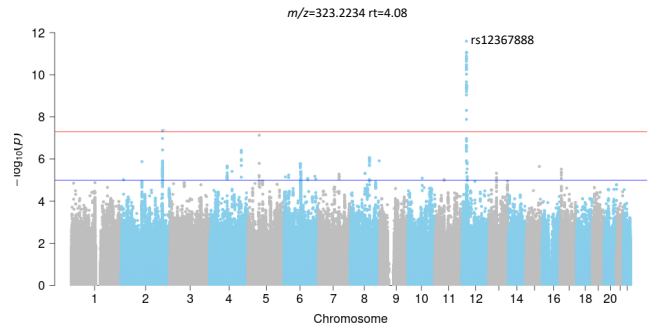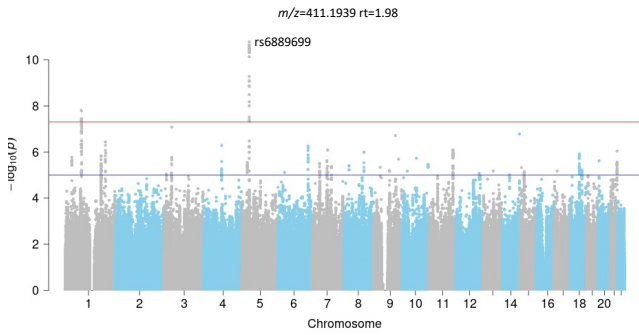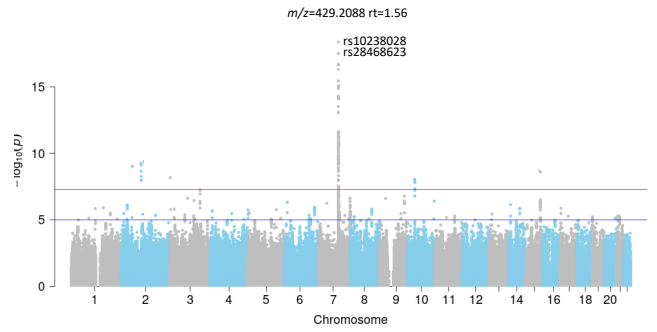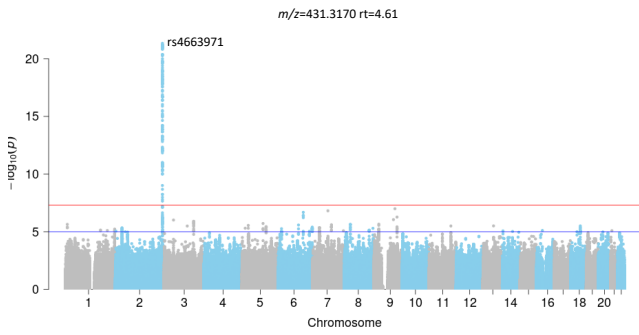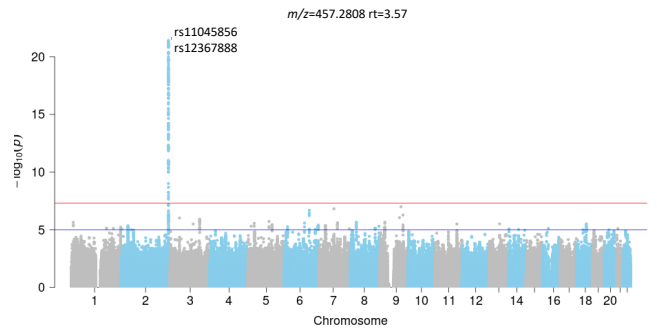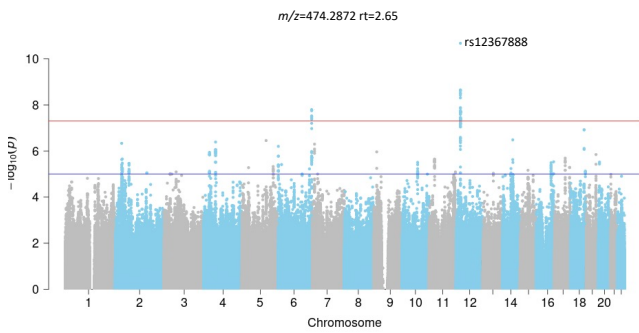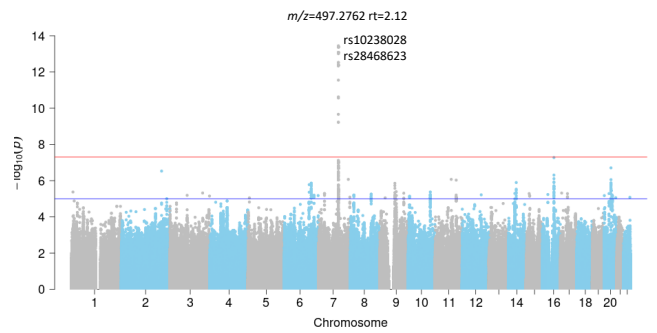

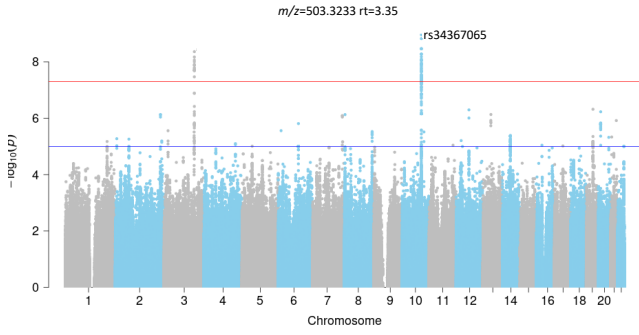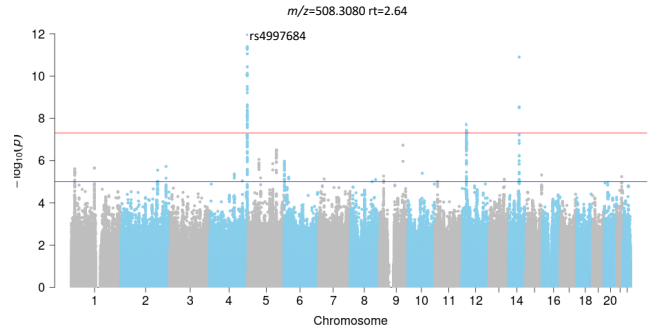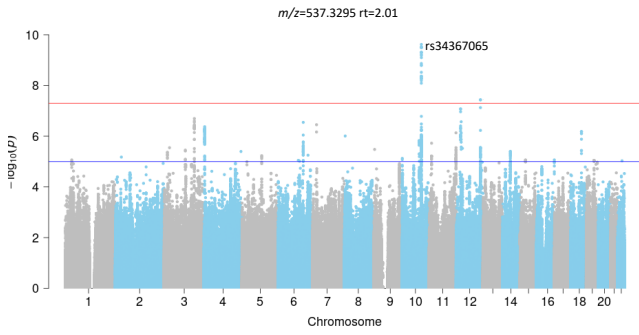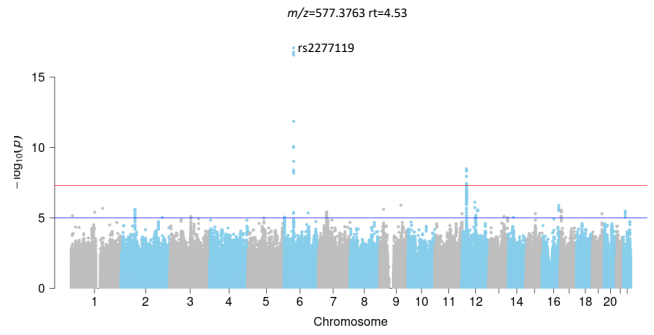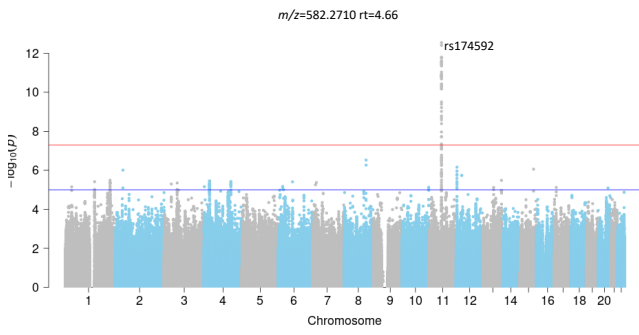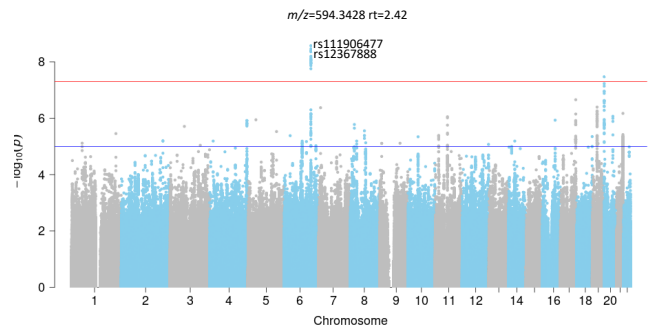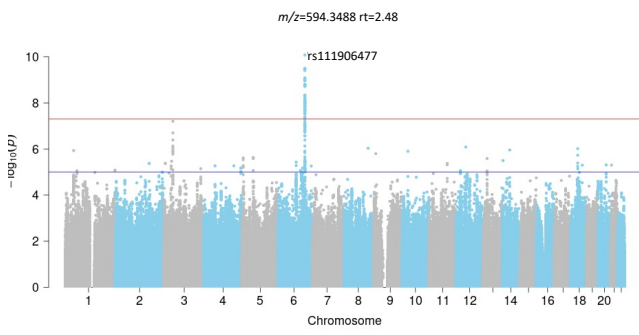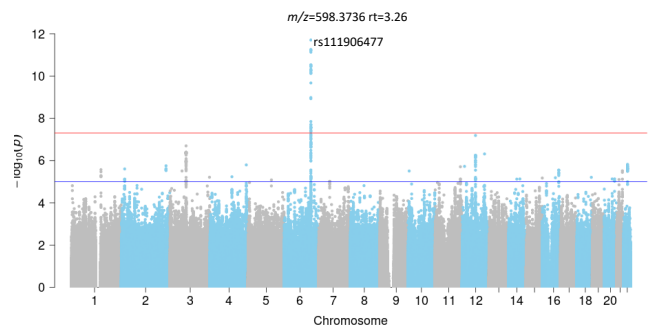

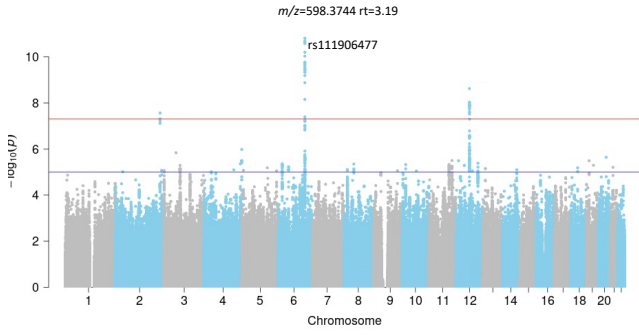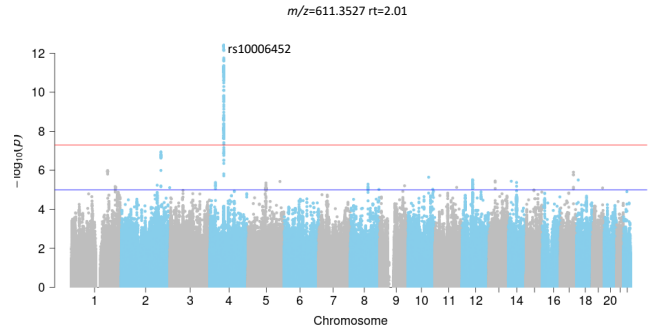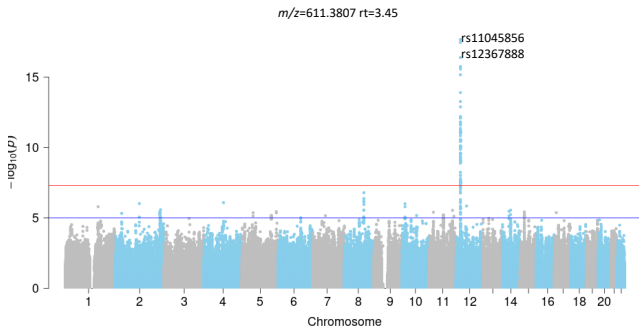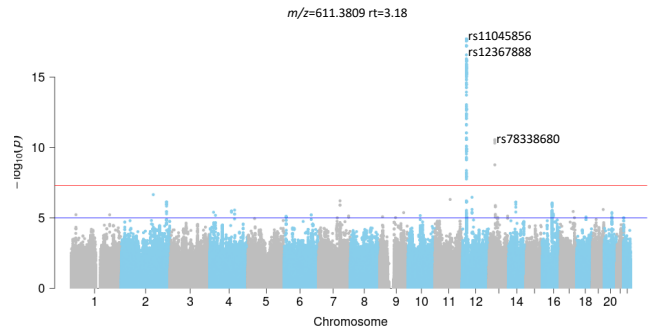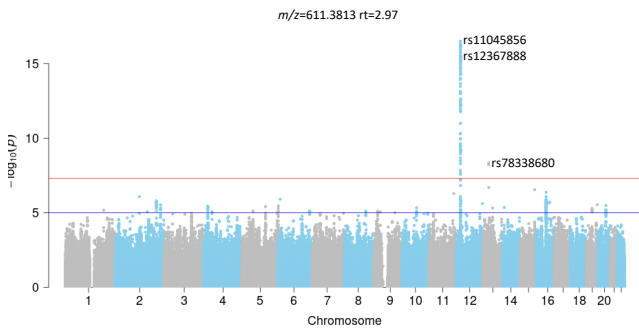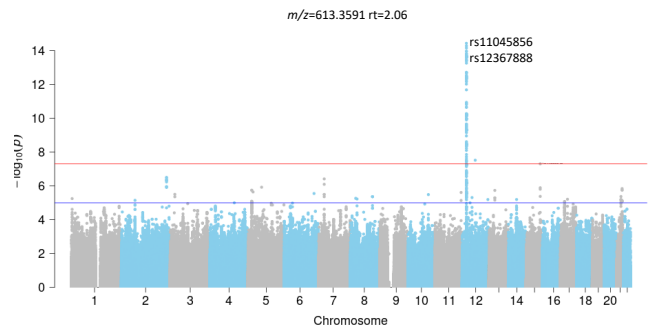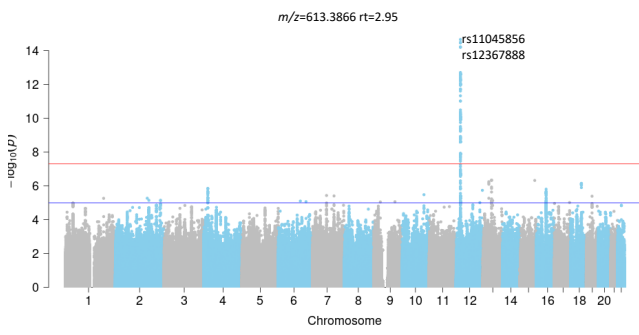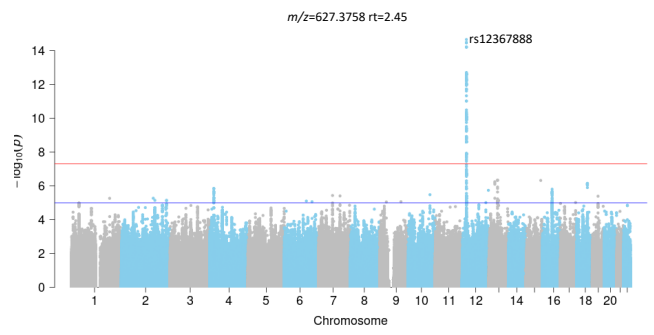

**Fig. S4: correlation matrices among PA significant annotated BAL, standard lipid markers, and BMI in VITAL-CTSC and JUPITER-NC substudies**

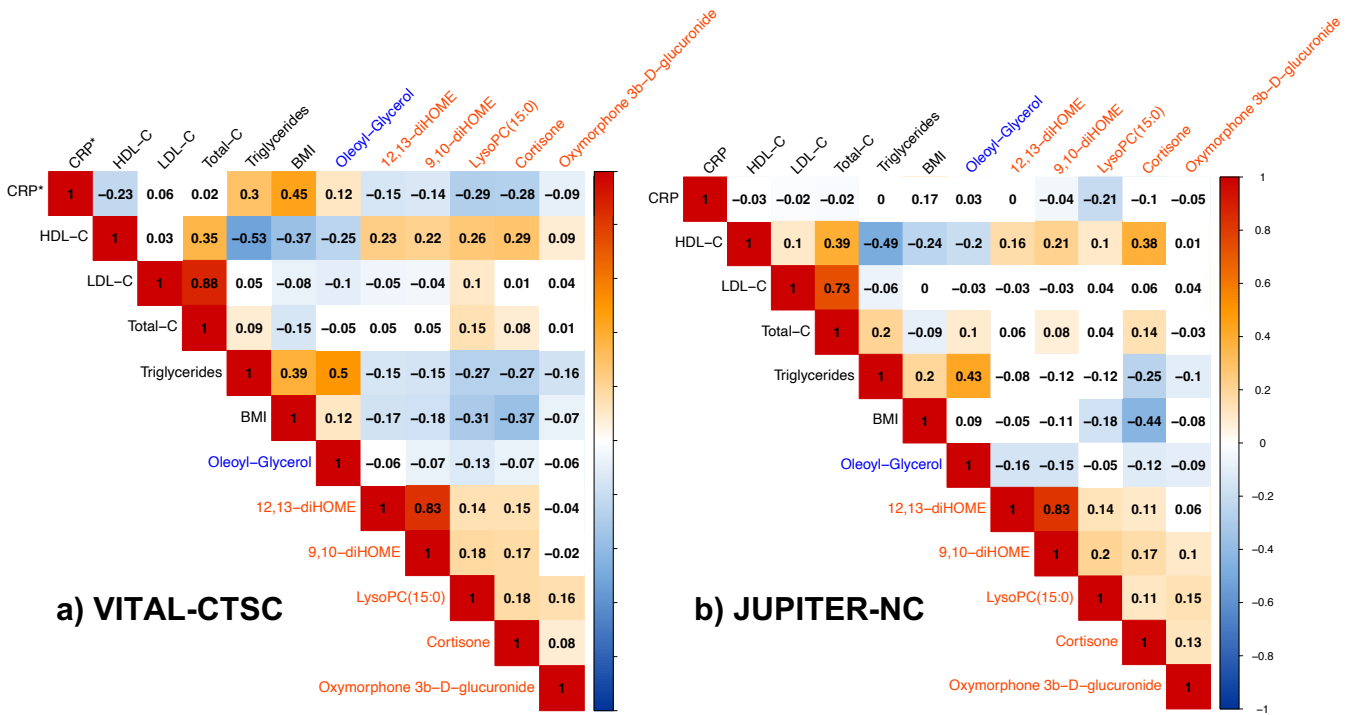

**a)** Spearman correlation matrix in VITAL-CTSC of baseline PA-associated annotated BALs (model 2), hsCRP, clinical lipid biomarkers, and BMI. CRP\* data available for 1015 participants. **b)** Spearman correlation matrix in JUPITER-NC of baseline PA-associated annotated BALs (model 2), CRP, clinical lipid biomarkers, and BMI. Black labels represent clinical measurements and biomarkers; Blue labels designate PA-negative related BAL; Orange labels designate PA-positive related BALs. The Jennrich test for the equality of two correlation matrices revealed P-value <0.001. **Abbreviations:** BMI – body mass index; LDL-C – low density lipoprotein cholesterol; HDL-C – high density lipoprotein cholesterol; hs-CRP – high-sensitivity C-reactive protein.

**Fig. S5: correlation matrices among CVD significant BAL, standard lipid markers, and BMI in VITAL-CVD and JUPITER-CVD sub-studies**

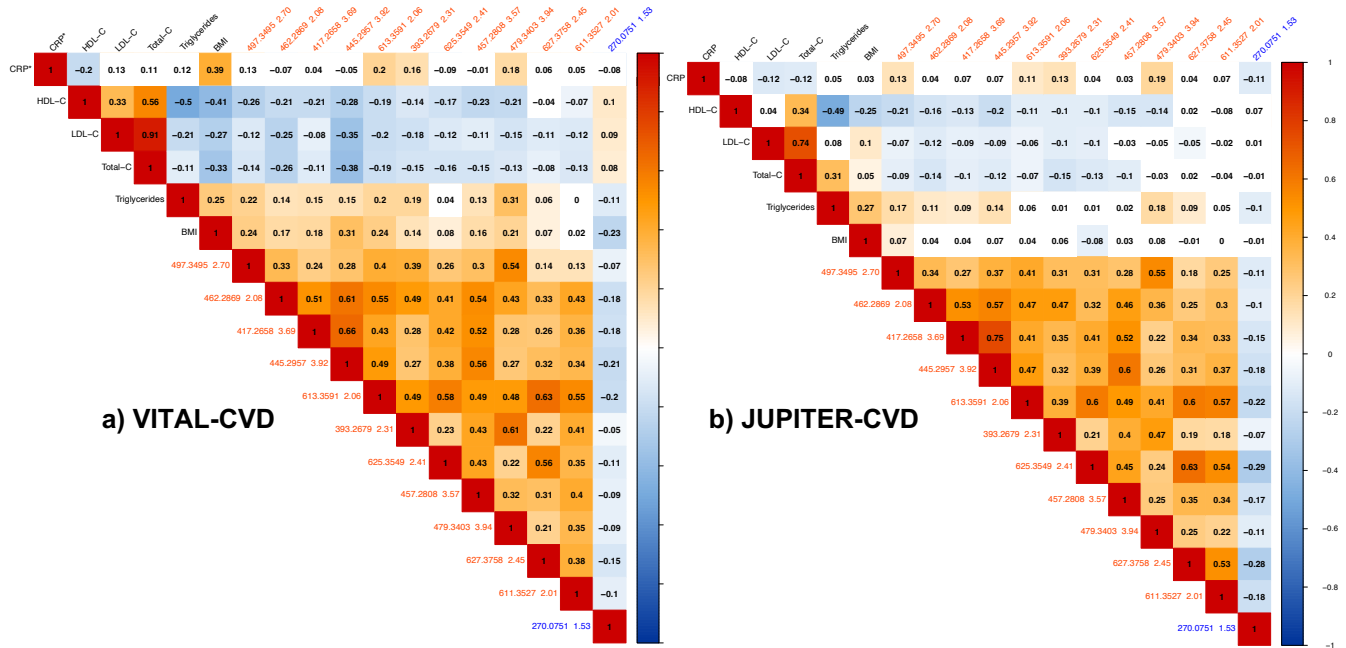

**a)** Spearman correlation matrix in VITAL-CVD of 12 CVD-associated (and validated) BALs (model 2), CRP, clinical lipid biomarkers, and BMI. CRP\* data available only for 97 cases and 89 controls.

**b)** Spearman correlation matrix in JUPITER-CVD of 12 CVD-associated (and validated) BALs (model 2), CRP, clinical lipid biomarkers, and BMI. Black labels represent clinical measurements and biomarkers; Orange labels designate CVD-positive related BAL. Blue label designate CVD-negative related BAL. Labels numbers are mass to charge ratio and retention time ( $m/z$  rt). The Jennrich test for the equality of two correlation matrices revealed P-value <0.001. **Abbreviations:** BMI – body mass index; LDL-C – low density lipoprotein cholesterol; HDL-C – high density lipoprotein cholesterol; hs-CRP – high-sensitivity C-reactive protein.

Fig. S6: Mediation analysis through BMI in the relationship between PA and BALs and between BALs and CVD

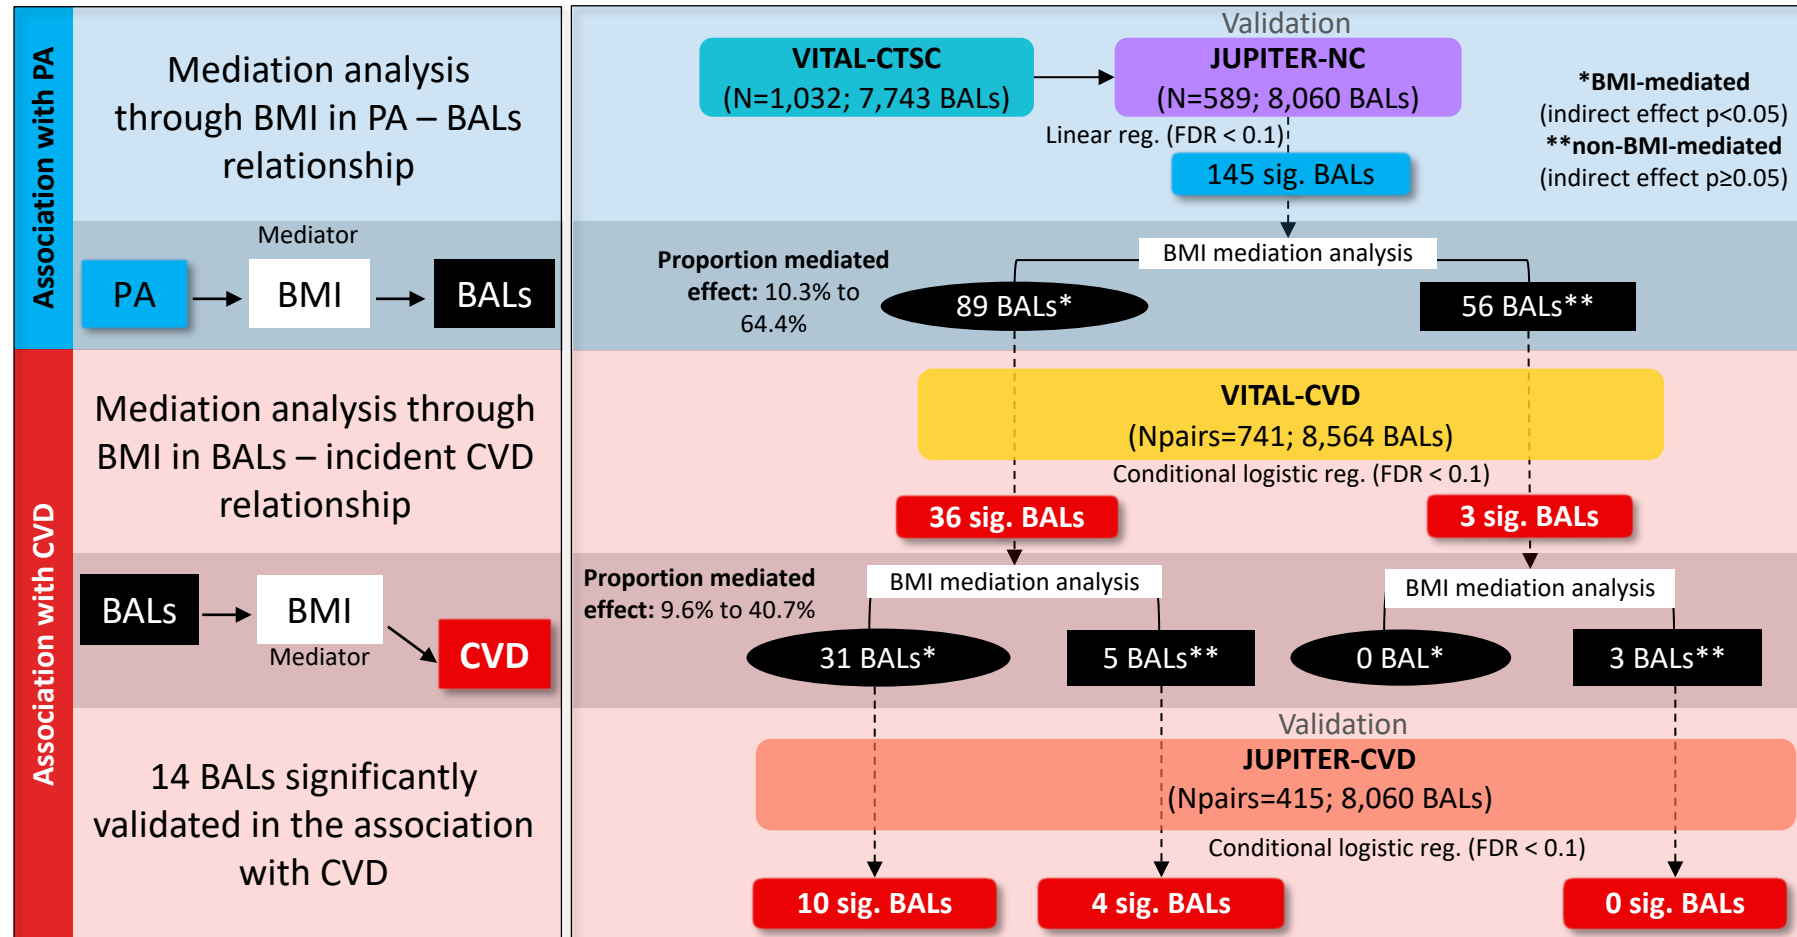

Diagram showing BAL associations mediated and non-mediated by BMI (adjusted for sex, age, race, LDL-C, total-C, and smoking). **Top blue panel:** Mediation analysis through baseline BMI performed on 145 cross-sectionally PA-related BAL revealed two sets of metabolites based on direct and indirect effects: 89 BMI-mediated and 56 non-BMI-mediated BALs. **Bottom red panel:** Each set of BALs was examined for associations with CVD and mediation through BMI. From the PA-BMI mediated set, we detected 32 BMI-mediated CVD associations in VITAL-CVD of which 11 validated in JUPITER-CVD; 4 non-mediated CVD associations in VITAL-CVD were also validated in JUPITER-CVD. From the set of non-mediated PA-BAL, no CVD association was validated in JUPITER-CVD. \*indirect effect P-value < 0.05; \*\*indirect effect P-value ≥ 0.05. Since no association between BMI and incident CVD was found in JUPITER-CVD, mediation analysis was not performed at this stage.

**Fig. S7: Mediation analysis through BALs in the relationship between PA and CVD**

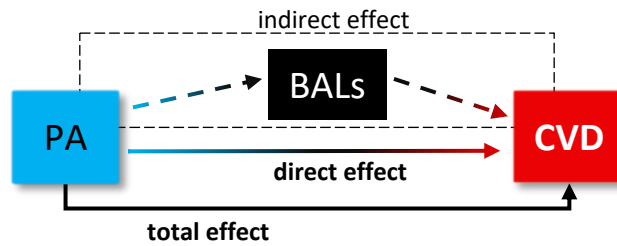

Diagram representing schematically the calculation of results presented in Table S7 from mediation analysis performed between PA and CVD through BALs. Indirect effect: the impact of PA on the CVD through BALs. Direct effect: the impact of PA on CVD in the presence of BALs as mediators. Total effect: the impact of PA on CVD without the involvement of BALs as mediators.
